# Supplementary material for: Knowledge, attitudes, and practices of veterinary professionals towards ticks and tick-borne diseases in Illinois
Source: PubMed Central journal article supplement (PMC9171534; doi:10.1016/j.onehlt.2022.100391), 2022-04-24
Supplement: mmc2.pdf [file mmc2.pdf]

# Veterinary KAP Survey

PID 373

[Project Home](#)
[Project Setup](#)
[Online Designer](#)
[Data Dictionary](#)
[Codebook](#)

Codebook ▾

## Data Dictionary Codebook

04-26-2021 9:37pm

[^ Collapse all instruments](#)

| #                                                                                                                                                                                     | Variable / Field Name | Field Label<br><i>Field Note</i>                                                                                                                                                                                                                                                                                                                                                                                                                                                                                                                                                                                                                                                                                                                                                                                                                                                                                                                                                                                                                                                                                                                                                                                                                                                                                                                 | Field Attributes (Field Type, Validation, Choices, Calculations, etc.) |
|---------------------------------------------------------------------------------------------------------------------------------------------------------------------------------------|-----------------------|--------------------------------------------------------------------------------------------------------------------------------------------------------------------------------------------------------------------------------------------------------------------------------------------------------------------------------------------------------------------------------------------------------------------------------------------------------------------------------------------------------------------------------------------------------------------------------------------------------------------------------------------------------------------------------------------------------------------------------------------------------------------------------------------------------------------------------------------------------------------------------------------------------------------------------------------------------------------------------------------------------------------------------------------------------------------------------------------------------------------------------------------------------------------------------------------------------------------------------------------------------------------------------------------------------------------------------------------------|------------------------------------------------------------------------|
| Instrument: <b>Veterinary KAP Survey</b> (veterinary_kap_survey) <span style="color: green;">🟢 Enabled as survey</span> <span style="float: right;"><a href="#">^ Collapse</a></span> |                       |                                                                                                                                                                                                                                                                                                                                                                                                                                                                                                                                                                                                                                                                                                                                                                                                                                                                                                                                                                                                                                                                                                                                                                                                                                                                                                                                                  |                                                                        |
| 1                                                                                                                                                                                     | participant_id        | Participant ID                                                                                                                                                                                                                                                                                                                                                                                                                                                                                                                                                                                                                                                                                                                                                                                                                                                                                                                                                                                                                                                                                                                                                                                                                                                                                                                                   | text                                                                   |
| 2                                                                                                                                                                                     | consent_form          | Knowledge, Attitudes, and Practices of Veterinary Professionals Towards Ticks and Tick-Borne Diseases Survey<br>You are being asked to participate in a voluntary research study. The purpose of this study is to assess your knowledge and experience with ticks and tick-borne diseases. Risks related to this research are not beyond what you would already experience in your everyday life. The researchers will not have access to your individually identifiable information. The benefits related to this research include improving our ability to design outreach and educational materials for veterinary professionals in Illinois. Principal Investigator Name and Title: Rebecca Smith, Associate Professor of Epidemiology Department and Institution: Department of Pathobiology, University of Illinois College of Veterinary Medicine<br>Contact Information: 217-300-1428 (phone); rlsdvm@illinois.edu (email)<br>What procedures are involved? The study procedures include completing an online survey. This research will be collected using REDCap, which is a data collection and management application. You will need to participate one time. Your participation will last approximately 15 minutes.<br>Will my study-related information be kept confidential? Faculty, students, and staff will not have access to | descriptive                                                            |

any of your individually identifiable information. Confidentiality will be maintained to the extent of laws and university policies. Personal identifiers will not be collected, published, or presented. Will I be reimbursed for any expenses or paid for my participation in this research? You will be given the option to receive a poster on ticks and tick-borne diseases in Illinois, suitable for hanging in a clinic. Can I withdraw or be removed from the study? If you decide to participate, you are free to withdraw your consent and discontinue participation at any time, please just close your browser. Your participation in this research is voluntary. Your decision whether or not to participate, or to withdraw after beginning participation, will not affect your current or future dealings with the University of Illinois at Urbana-Champaign. Will data collected from me be used for any other research? Your de-identified information could be used for future research without additional informed consent. Whom should I contact if I have questions? If you have questions about this project, you may contact the principal investigator, Rebecca Smith, Associate Professor via phone at 217-300-1428 or via email to [rlsdvm@illinois.edu](mailto:rlsdvm@illinois.edu); or Nohra Mateus-Pinilla, Director, Wildlife Veterinary Epidemiology Laboratory via phone at 217-333-6856 or via email to [nohram@illinois.edu](mailto:nohram@illinois.edu). If you have any questions about your rights as a participant in this study or any concerns or complaints, please contact the University of Illinois at Urbana-Champaign Office for the Protection of Research Subjects at 217-333-2670 or via email at [irb@illinois.edu](mailto:irb@illinois.edu). Please print this consent form if you would like to retain a copy for your records. I have read and understand the above consent form. I certify that I am 18 years old or older. By clicking the "Submit" button to enter the survey, I indicate my willingness to voluntarily take part in this study.

|   |                         |                                                                                                                                                                                                                                                                                                                                                                                                                                                                                                                                                                                                                                                                                                                                                                                                                                                                                                                                                                                                                                                                                                                                       |                                                                                                                                                                                                                                                                                                                                    |   |          |   |       |   |           |   |                         |   |       |   |       |   |              |
|---|-------------------------|---------------------------------------------------------------------------------------------------------------------------------------------------------------------------------------------------------------------------------------------------------------------------------------------------------------------------------------------------------------------------------------------------------------------------------------------------------------------------------------------------------------------------------------------------------------------------------------------------------------------------------------------------------------------------------------------------------------------------------------------------------------------------------------------------------------------------------------------------------------------------------------------------------------------------------------------------------------------------------------------------------------------------------------------------------------------------------------------------------------------------------------|------------------------------------------------------------------------------------------------------------------------------------------------------------------------------------------------------------------------------------------------------------------------------------------------------------------------------------|---|----------|---|-------|---|-----------|---|-------------------------|---|-------|---|-------|---|--------------|
| 3 | introduction            | <p>Section Header: <i>Start</i></p> <p>Greetings all. Thank you for participating in this short survey. Participation is voluntary and declining to participate or finish the survey will involve no penalties. The goal of this survey is to assess the knowledge, attitudes, and practices among veterinarians and veterinary technicians in regards to tick-borne diseases. Participation should only take about 15 minutes of your time. Information will remain confidential and identifying information will be collected in a categorical fashion to protect identities of participants. No foreseeable risks are associated with the taking of this survey. Benefits include an informational poster to express our gratitude for your participation and the furthering of science related to public health in your area. Please send any questions to: <a href="mailto:itick@vetmed.illinois.edu">itick@vetmed.illinois.edu</a>.</p> <p>We greatly appreciate your participation. As thanks, upon completion you will be mailed a poster for your waiting room to show your support of important public health research.</p> | descriptive                                                                                                                                                                                                                                                                                                                        |   |          |   |       |   |           |   |                         |   |       |   |       |   |              |
| 4 | age                     | <p>Section Header: <i>Demographics</i></p> <p>Please select the group that includes your age.</p>                                                                                                                                                                                                                                                                                                                                                                                                                                                                                                                                                                                                                                                                                                                                                                                                                                                                                                                                                                                                                                     | <p>dropdown</p> <table border="1" data-bbox="1356 818 1577 1192"> <tr><td>1</td><td>Under 18</td></tr> <tr><td>2</td><td>18-24</td></tr> <tr><td>3</td><td>25-34</td></tr> <tr><td>4</td><td>35-44</td></tr> <tr><td>5</td><td>45-54</td></tr> <tr><td>6</td><td>55-64</td></tr> <tr><td>7</td><td>65 and above</td></tr> </table> | 1 | Under 18 | 2 | 18-24 | 3 | 25-34     | 4 | 35-44                   | 5 | 45-54 | 6 | 55-64 | 7 | 65 and above |
| 1 | Under 18                |                                                                                                                                                                                                                                                                                                                                                                                                                                                                                                                                                                                                                                                                                                                                                                                                                                                                                                                                                                                                                                                                                                                                       |                                                                                                                                                                                                                                                                                                                                    |   |          |   |       |   |           |   |                         |   |       |   |       |   |              |
| 2 | 18-24                   |                                                                                                                                                                                                                                                                                                                                                                                                                                                                                                                                                                                                                                                                                                                                                                                                                                                                                                                                                                                                                                                                                                                                       |                                                                                                                                                                                                                                                                                                                                    |   |          |   |       |   |           |   |                         |   |       |   |       |   |              |
| 3 | 25-34                   |                                                                                                                                                                                                                                                                                                                                                                                                                                                                                                                                                                                                                                                                                                                                                                                                                                                                                                                                                                                                                                                                                                                                       |                                                                                                                                                                                                                                                                                                                                    |   |          |   |       |   |           |   |                         |   |       |   |       |   |              |
| 4 | 35-44                   |                                                                                                                                                                                                                                                                                                                                                                                                                                                                                                                                                                                                                                                                                                                                                                                                                                                                                                                                                                                                                                                                                                                                       |                                                                                                                                                                                                                                                                                                                                    |   |          |   |       |   |           |   |                         |   |       |   |       |   |              |
| 5 | 45-54                   |                                                                                                                                                                                                                                                                                                                                                                                                                                                                                                                                                                                                                                                                                                                                                                                                                                                                                                                                                                                                                                                                                                                                       |                                                                                                                                                                                                                                                                                                                                    |   |          |   |       |   |           |   |                         |   |       |   |       |   |              |
| 6 | 55-64                   |                                                                                                                                                                                                                                                                                                                                                                                                                                                                                                                                                                                                                                                                                                                                                                                                                                                                                                                                                                                                                                                                                                                                       |                                                                                                                                                                                                                                                                                                                                    |   |          |   |       |   |           |   |                         |   |       |   |       |   |              |
| 7 | 65 and above            |                                                                                                                                                                                                                                                                                                                                                                                                                                                                                                                                                                                                                                                                                                                                                                                                                                                                                                                                                                                                                                                                                                                                       |                                                                                                                                                                                                                                                                                                                                    |   |          |   |       |   |           |   |                         |   |       |   |       |   |              |
| 5 | gender                  | Please select the gender you identify with most.                                                                                                                                                                                                                                                                                                                                                                                                                                                                                                                                                                                                                                                                                                                                                                                                                                                                                                                                                                                                                                                                                      | <p>radio</p> <table border="1" data-bbox="1356 1245 1692 1459"> <tr><td>1</td><td>Female</td></tr> <tr><td>2</td><td>Male</td></tr> <tr><td>3</td><td>Nonbinary</td></tr> <tr><td>4</td><td>Other/Prefer not to say</td></tr> </table>                                                                                             | 1 | Female   | 2 | Male  | 3 | Nonbinary | 4 | Other/Prefer not to say |   |       |   |       |   |              |
| 1 | Female                  |                                                                                                                                                                                                                                                                                                                                                                                                                                                                                                                                                                                                                                                                                                                                                                                                                                                                                                                                                                                                                                                                                                                                       |                                                                                                                                                                                                                                                                                                                                    |   |          |   |       |   |           |   |                         |   |       |   |       |   |              |
| 2 | Male                    |                                                                                                                                                                                                                                                                                                                                                                                                                                                                                                                                                                                                                                                                                                                                                                                                                                                                                                                                                                                                                                                                                                                                       |                                                                                                                                                                                                                                                                                                                                    |   |          |   |       |   |           |   |                         |   |       |   |       |   |              |
| 3 | Nonbinary               |                                                                                                                                                                                                                                                                                                                                                                                                                                                                                                                                                                                                                                                                                                                                                                                                                                                                                                                                                                                                                                                                                                                                       |                                                                                                                                                                                                                                                                                                                                    |   |          |   |       |   |           |   |                         |   |       |   |       |   |              |
| 4 | Other/Prefer not to say |                                                                                                                                                                                                                                                                                                                                                                                                                                                                                                                                                                                                                                                                                                                                                                                                                                                                                                                                                                                                                                                                                                                                       |                                                                                                                                                                                                                                                                                                                                    |   |          |   |       |   |           |   |                         |   |       |   |       |   |              |
| 6 | county                  | Please list the county/counties in which you practice.                                                                                                                                                                                                                                                                                                                                                                                                                                                                                                                                                                                                                                                                                                                                                                                                                                                                                                                                                                                                                                                                                | text, Required                                                                                                                                                                                                                                                                                                                     |   |          |   |       |   |           |   |                         |   |       |   |       |   |              |

|    |                                                                                                                                                                                                                                                                  |                                                                                                        |                                                                                                                                                                                                                                                                                                                                        |   |                   |   |                                |   |                         |   |                          |   |                   |   |                        |   |               |
|----|------------------------------------------------------------------------------------------------------------------------------------------------------------------------------------------------------------------------------------------------------------------|--------------------------------------------------------------------------------------------------------|----------------------------------------------------------------------------------------------------------------------------------------------------------------------------------------------------------------------------------------------------------------------------------------------------------------------------------------|---|-------------------|---|--------------------------------|---|-------------------------|---|--------------------------|---|-------------------|---|------------------------|---|---------------|
| 7  | practice_distribution                                                                                                                                                                                                                                            | Please select your clinic's practice distribution.                                                     | radio<br><table border="1"> <tr><td>1</td><td>Small animal only</td></tr> <tr><td>2</td><td>Small animal predominant</td></tr> <tr><td>3</td><td>Mixed animal</td></tr> <tr><td>4</td><td>Large animal predominant</td></tr> <tr><td>5</td><td>Large animal only</td></tr> <tr><td>6</td><td>Production animal only</td></tr> </table> | 1 | Small animal only | 2 | Small animal predominant       | 3 | Mixed animal            | 4 | Large animal predominant | 5 | Large animal only | 6 | Production animal only |   |               |
| 1  | Small animal only                                                                                                                                                                                                                                                |                                                                                                        |                                                                                                                                                                                                                                                                                                                                        |   |                   |   |                                |   |                         |   |                          |   |                   |   |                        |   |               |
| 2  | Small animal predominant                                                                                                                                                                                                                                         |                                                                                                        |                                                                                                                                                                                                                                                                                                                                        |   |                   |   |                                |   |                         |   |                          |   |                   |   |                        |   |               |
| 3  | Mixed animal                                                                                                                                                                                                                                                     |                                                                                                        |                                                                                                                                                                                                                                                                                                                                        |   |                   |   |                                |   |                         |   |                          |   |                   |   |                        |   |               |
| 4  | Large animal predominant                                                                                                                                                                                                                                         |                                                                                                        |                                                                                                                                                                                                                                                                                                                                        |   |                   |   |                                |   |                         |   |                          |   |                   |   |                        |   |               |
| 5  | Large animal only                                                                                                                                                                                                                                                |                                                                                                        |                                                                                                                                                                                                                                                                                                                                        |   |                   |   |                                |   |                         |   |                          |   |                   |   |                        |   |               |
| 6  | Production animal only                                                                                                                                                                                                                                           |                                                                                                        |                                                                                                                                                                                                                                                                                                                                        |   |                   |   |                                |   |                         |   |                          |   |                   |   |                        |   |               |
| 8  | species_specific<br>Show the field ONLY if:<br>[practice_distribution] = '1' or<br>[practice_distribution] = '2' or<br>[practice_distribution] = '4' or<br>[practice_distribution] = '3' or<br>[practice_distribution] = '5' or<br>[practice_distribution] = '6' | If your clinic is single species exclusive, please identify it here.<br>(Ex. Swine only).              | text                                                                                                                                                                                                                                                                                                                                   |   |                   |   |                                |   |                         |   |                          |   |                   |   |                        |   |               |
| 9  | job_position                                                                                                                                                                                                                                                     | Please indicate if you are a veterinarian, licensed veterinary technician, or veterinary staff member. | radio, Required<br><table border="1"> <tr><td>2</td><td>Veterinarian</td></tr> <tr><td>1</td><td>Licensed veterinary technician</td></tr> <tr><td>0</td><td>Veterinary staff member</td></tr> </table>                                                                                                                                 | 2 | Veterinarian      | 1 | Licensed veterinary technician | 0 | Veterinary staff member |   |                          |   |                   |   |                        |   |               |
| 2  | Veterinarian                                                                                                                                                                                                                                                     |                                                                                                        |                                                                                                                                                                                                                                                                                                                                        |   |                   |   |                                |   |                         |   |                          |   |                   |   |                        |   |               |
| 1  | Licensed veterinary technician                                                                                                                                                                                                                                   |                                                                                                        |                                                                                                                                                                                                                                                                                                                                        |   |                   |   |                                |   |                         |   |                          |   |                   |   |                        |   |               |
| 0  | Veterinary staff member                                                                                                                                                                                                                                          |                                                                                                        |                                                                                                                                                                                                                                                                                                                                        |   |                   |   |                                |   |                         |   |                          |   |                   |   |                        |   |               |
| 10 | years_in_practice                                                                                                                                                                                                                                                | How many years have you been in practice?                                                              | dropdown<br><table border="1"> <tr><td>1</td><td>Less than 5 years</td></tr> <tr><td>2</td><td>6-10 years</td></tr> <tr><td>3</td><td>11-15 years</td></tr> <tr><td>4</td><td>16-20 years</td></tr> <tr><td>5</td><td>21-25 years</td></tr> <tr><td>6</td><td>26-30 years</td></tr> <tr><td>7</td><td>Over 30 years</td></tr> </table> | 1 | Less than 5 years | 2 | 6-10 years                     | 3 | 11-15 years             | 4 | 16-20 years              | 5 | 21-25 years       | 6 | 26-30 years            | 7 | Over 30 years |
| 1  | Less than 5 years                                                                                                                                                                                                                                                |                                                                                                        |                                                                                                                                                                                                                                                                                                                                        |   |                   |   |                                |   |                         |   |                          |   |                   |   |                        |   |               |
| 2  | 6-10 years                                                                                                                                                                                                                                                       |                                                                                                        |                                                                                                                                                                                                                                                                                                                                        |   |                   |   |                                |   |                         |   |                          |   |                   |   |                        |   |               |
| 3  | 11-15 years                                                                                                                                                                                                                                                      |                                                                                                        |                                                                                                                                                                                                                                                                                                                                        |   |                   |   |                                |   |                         |   |                          |   |                   |   |                        |   |               |
| 4  | 16-20 years                                                                                                                                                                                                                                                      |                                                                                                        |                                                                                                                                                                                                                                                                                                                                        |   |                   |   |                                |   |                         |   |                          |   |                   |   |                        |   |               |
| 5  | 21-25 years                                                                                                                                                                                                                                                      |                                                                                                        |                                                                                                                                                                                                                                                                                                                                        |   |                   |   |                                |   |                         |   |                          |   |                   |   |                        |   |               |
| 6  | 26-30 years                                                                                                                                                                                                                                                      |                                                                                                        |                                                                                                                                                                                                                                                                                                                                        |   |                   |   |                                |   |                         |   |                          |   |                   |   |                        |   |               |
| 7  | Over 30 years                                                                                                                                                                                                                                                    |                                                                                                        |                                                                                                                                                                                                                                                                                                                                        |   |                   |   |                                |   |                         |   |                          |   |                   |   |                        |   |               |

|    |                                                                   |                                                                                                                                                                                                                                                                      |                                                                                                                                                                                                                                                                                                                                        |   |                   |   |            |   |             |   |             |   |             |   |             |   |               |
|----|-------------------------------------------------------------------|----------------------------------------------------------------------------------------------------------------------------------------------------------------------------------------------------------------------------------------------------------------------|----------------------------------------------------------------------------------------------------------------------------------------------------------------------------------------------------------------------------------------------------------------------------------------------------------------------------------------|---|-------------------|---|------------|---|-------------|---|-------------|---|-------------|---|-------------|---|---------------|
| 11 | years_in_area                                                     | How many years have you been practicing in your current area?                                                                                                                                                                                                        | dropdown<br><table border="1"> <tr><td>1</td><td>Less than 5 years</td></tr> <tr><td>2</td><td>6-10 years</td></tr> <tr><td>3</td><td>11-15 years</td></tr> <tr><td>4</td><td>16-20 years</td></tr> <tr><td>5</td><td>21-25 years</td></tr> <tr><td>6</td><td>26-30 years</td></tr> <tr><td>7</td><td>Over 30 years</td></tr> </table> | 1 | Less than 5 years | 2 | 6-10 years | 3 | 11-15 years | 4 | 16-20 years | 5 | 21-25 years | 6 | 26-30 years | 7 | Over 30 years |
| 1  | Less than 5 years                                                 |                                                                                                                                                                                                                                                                      |                                                                                                                                                                                                                                                                                                                                        |   |                   |   |            |   |             |   |             |   |             |   |             |   |               |
| 2  | 6-10 years                                                        |                                                                                                                                                                                                                                                                      |                                                                                                                                                                                                                                                                                                                                        |   |                   |   |            |   |             |   |             |   |             |   |             |   |               |
| 3  | 11-15 years                                                       |                                                                                                                                                                                                                                                                      |                                                                                                                                                                                                                                                                                                                                        |   |                   |   |            |   |             |   |             |   |             |   |             |   |               |
| 4  | 16-20 years                                                       |                                                                                                                                                                                                                                                                      |                                                                                                                                                                                                                                                                                                                                        |   |                   |   |            |   |             |   |             |   |             |   |             |   |               |
| 5  | 21-25 years                                                       |                                                                                                                                                                                                                                                                      |                                                                                                                                                                                                                                                                                                                                        |   |                   |   |            |   |             |   |             |   |             |   |             |   |               |
| 6  | 26-30 years                                                       |                                                                                                                                                                                                                                                                      |                                                                                                                                                                                                                                                                                                                                        |   |                   |   |            |   |             |   |             |   |             |   |             |   |               |
| 7  | Over 30 years                                                     |                                                                                                                                                                                                                                                                      |                                                                                                                                                                                                                                                                                                                                        |   |                   |   |            |   |             |   |             |   |             |   |             |   |               |
| 12 | training                                                          | Have you ever been trained on tick species or tick-borne diseases?                                                                                                                                                                                                   | yesno<br><table border="1"> <tr><td>1</td><td>Yes</td></tr> <tr><td>0</td><td>No</td></tr> </table>                                                                                                                                                                                                                                    | 1 | Yes               | 0 | No         |   |             |   |             |   |             |   |             |   |               |
| 1  | Yes                                                               |                                                                                                                                                                                                                                                                      |                                                                                                                                                                                                                                                                                                                                        |   |                   |   |            |   |             |   |             |   |             |   |             |   |               |
| 0  | No                                                                |                                                                                                                                                                                                                                                                      |                                                                                                                                                                                                                                                                                                                                        |   |                   |   |            |   |             |   |             |   |             |   |             |   |               |
| 13 | training_years_ago<br>Show the field ONLY if:<br>[training] = '1' | How long ago was your training in years?                                                                                                                                                                                                                             | text                                                                                                                                                                                                                                                                                                                                   |   |                   |   |            |   |             |   |             |   |             |   |             |   |               |
| 14 | kind_of_training<br>Show the field ONLY if:<br>[training] = '1'   | What kind of training did you receive?                                                                                                                                                                                                                               | notes                                                                                                                                                                                                                                                                                                                                  |   |                   |   |            |   |             |   |             |   |             |   |             |   |               |
| 15 | tick_species_near                                                 | Section Header: <i>Knowledge In this section, we would like to gain knowledge of your current understanding of ticks and tick-borne diseases. We are simply interested in what you know.</i><br><br>Please list any tick species that you know of that are near you. | notes                                                                                                                                                                                                                                                                                                                                  |   |                   |   |            |   |             |   |             |   |             |   |             |   |               |
| 16 | disease_species                                                   | Please indicate any species of tick you recorded above that can carry disease.                                                                                                                                                                                       | notes                                                                                                                                                                                                                                                                                                                                  |   |                   |   |            |   |             |   |             |   |             |   |             |   |               |
| 17 | time_to_transmit                                                  | How long does a tick have to be attached to you or an animal to transmit disease?                                                                                                                                                                                    | radio<br><table border="1"> <tr><td>0</td><td>Seconds</td></tr> <tr><td>3</td><td>Minutes</td></tr> <tr><td>2</td><td>Hours</td></tr> <tr><td>1</td><td>Days</td></tr> </table>                                                                                                                                                        | 0 | Seconds           | 3 | Minutes    | 2 | Hours       | 1 | Days        |   |             |   |             |   |               |
| 0  | Seconds                                                           |                                                                                                                                                                                                                                                                      |                                                                                                                                                                                                                                                                                                                                        |   |                   |   |            |   |             |   |             |   |             |   |             |   |               |
| 3  | Minutes                                                           |                                                                                                                                                                                                                                                                      |                                                                                                                                                                                                                                                                                                                                        |   |                   |   |            |   |             |   |             |   |             |   |             |   |               |
| 2  | Hours                                                             |                                                                                                                                                                                                                                                                      |                                                                                                                                                                                                                                                                                                                                        |   |                   |   |            |   |             |   |             |   |             |   |             |   |               |
| 1  | Days                                                              |                                                                                                                                                                                                                                                                      |                                                                                                                                                                                                                                                                                                                                        |   |                   |   |            |   |             |   |             |   |             |   |             |   |               |

|    |                   |                                                                                                                  |                                                                                                                                                                                                                                                                                                                                                                                                                                                                                                                                                                                                                                                                                                                       |   |                   |                |    |                   |            |   |                   |                 |   |                   |                         |   |                   |                     |   |                   |                   |   |                   |                  |   |                   |           |   |                   |                  |
|----|-------------------|------------------------------------------------------------------------------------------------------------------|-----------------------------------------------------------------------------------------------------------------------------------------------------------------------------------------------------------------------------------------------------------------------------------------------------------------------------------------------------------------------------------------------------------------------------------------------------------------------------------------------------------------------------------------------------------------------------------------------------------------------------------------------------------------------------------------------------------------------|---|-------------------|----------------|----|-------------------|------------|---|-------------------|-----------------|---|-------------------|-------------------------|---|-------------------|---------------------|---|-------------------|-------------------|---|-------------------|------------------|---|-------------------|-----------|---|-------------------|------------------|
| 18 | bite              | Can you always tell if a tick has bitten you?                                                                    | yesno<br><table border="1"> <tr> <td>1</td> <td>Yes</td> </tr> <tr> <td>0</td> <td>No</td> </tr> </table>                                                                                                                                                                                                                                                                                                                                                                                                                                                                                                                                                                                                             | 1 | Yes               | 0              | No |                   |            |   |                   |                 |   |                   |                         |   |                   |                     |   |                   |                   |   |                   |                  |   |                   |           |   |                   |                  |
| 1  | Yes               |                                                                                                                  |                                                                                                                                                                                                                                                                                                                                                                                                                                                                                                                                                                                                                                                                                                                       |   |                   |                |    |                   |            |   |                   |                 |   |                   |                         |   |                   |                     |   |                   |                   |   |                   |                  |   |                   |           |   |                   |                  |
| 0  | No                |                                                                                                                  |                                                                                                                                                                                                                                                                                                                                                                                                                                                                                                                                                                                                                                                                                                                       |   |                   |                |    |                   |            |   |                   |                 |   |                   |                         |   |                   |                     |   |                   |                   |   |                   |                  |   |                   |           |   |                   |                  |
| 19 | tick_habitat      | Which of the below are considered preferred habitats for ticks?<br>(Please select as many as you believe apply). | checkbox<br><table border="1"> <tr> <td>0</td> <td>tick_habitat__0</td> <td>Desert</td> </tr> <tr> <td>3</td> <td>tick_habitat__3</td> <td>Grasslands</td> </tr> <tr> <td>4</td> <td>tick_habitat__4</td> <td>Woodlands</td> </tr> <tr> <td>1</td> <td>tick_habitat__1</td> <td>Swamps</td> </tr> <tr> <td>2</td> <td>tick_habitat__2</td> <td>Agricultural fields</td> </tr> </table>                                                                                                                                                                                                                                                                                                                                | 0 | tick_habitat__0   | Desert         | 3  | tick_habitat__3   | Grasslands | 4 | tick_habitat__4   | Woodlands       | 1 | tick_habitat__1   | Swamps                  | 2 | tick_habitat__2   | Agricultural fields |   |                   |                   |   |                   |                  |   |                   |           |   |                   |                  |
| 0  | tick_habitat__0   | Desert                                                                                                           |                                                                                                                                                                                                                                                                                                                                                                                                                                                                                                                                                                                                                                                                                                                       |   |                   |                |    |                   |            |   |                   |                 |   |                   |                         |   |                   |                     |   |                   |                   |   |                   |                  |   |                   |           |   |                   |                  |
| 3  | tick_habitat__3   | Grasslands                                                                                                       |                                                                                                                                                                                                                                                                                                                                                                                                                                                                                                                                                                                                                                                                                                                       |   |                   |                |    |                   |            |   |                   |                 |   |                   |                         |   |                   |                     |   |                   |                   |   |                   |                  |   |                   |           |   |                   |                  |
| 4  | tick_habitat__4   | Woodlands                                                                                                        |                                                                                                                                                                                                                                                                                                                                                                                                                                                                                                                                                                                                                                                                                                                       |   |                   |                |    |                   |            |   |                   |                 |   |                   |                         |   |                   |                     |   |                   |                   |   |                   |                  |   |                   |           |   |                   |                  |
| 1  | tick_habitat__1   | Swamps                                                                                                           |                                                                                                                                                                                                                                                                                                                                                                                                                                                                                                                                                                                                                                                                                                                       |   |                   |                |    |                   |            |   |                   |                 |   |                   |                         |   |                   |                     |   |                   |                   |   |                   |                  |   |                   |           |   |                   |                  |
| 2  | tick_habitat__2   | Agricultural fields                                                                                              |                                                                                                                                                                                                                                                                                                                                                                                                                                                                                                                                                                                                                                                                                                                       |   |                   |                |    |                   |            |   |                   |                 |   |                   |                         |   |                   |                     |   |                   |                   |   |                   |                  |   |                   |           |   |                   |                  |
| 20 | bite_locations    | Where on the body are locations where ticks commonly attach and bite? (Please select all that apply).            | checkbox<br><table border="1"> <tr> <td>0</td> <td>bite_locations__0</td> <td>Under the arms</td> </tr> <tr> <td>1</td> <td>bite_locations__1</td> <td>In hair</td> </tr> <tr> <td>2</td> <td>bite_locations__2</td> <td>Behind the ears</td> </tr> <tr> <td>3</td> <td>bite_locations__3</td> <td>Inside the belly button</td> </tr> <tr> <td>4</td> <td>bite_locations__4</td> <td>Wrists</td> </tr> <tr> <td>5</td> <td>bite_locations__5</td> <td>Back of the knees</td> </tr> <tr> <td>6</td> <td>bite_locations__6</td> <td>Between the legs</td> </tr> <tr> <td>7</td> <td>bite_locations__7</td> <td>Shoulders</td> </tr> <tr> <td>8</td> <td>bite_locations__8</td> <td>Around the waist</td> </tr> </table> | 0 | bite_locations__0 | Under the arms | 1  | bite_locations__1 | In hair    | 2 | bite_locations__2 | Behind the ears | 3 | bite_locations__3 | Inside the belly button | 4 | bite_locations__4 | Wrists              | 5 | bite_locations__5 | Back of the knees | 6 | bite_locations__6 | Between the legs | 7 | bite_locations__7 | Shoulders | 8 | bite_locations__8 | Around the waist |
| 0  | bite_locations__0 | Under the arms                                                                                                   |                                                                                                                                                                                                                                                                                                                                                                                                                                                                                                                                                                                                                                                                                                                       |   |                   |                |    |                   |            |   |                   |                 |   |                   |                         |   |                   |                     |   |                   |                   |   |                   |                  |   |                   |           |   |                   |                  |
| 1  | bite_locations__1 | In hair                                                                                                          |                                                                                                                                                                                                                                                                                                                                                                                                                                                                                                                                                                                                                                                                                                                       |   |                   |                |    |                   |            |   |                   |                 |   |                   |                         |   |                   |                     |   |                   |                   |   |                   |                  |   |                   |           |   |                   |                  |
| 2  | bite_locations__2 | Behind the ears                                                                                                  |                                                                                                                                                                                                                                                                                                                                                                                                                                                                                                                                                                                                                                                                                                                       |   |                   |                |    |                   |            |   |                   |                 |   |                   |                         |   |                   |                     |   |                   |                   |   |                   |                  |   |                   |           |   |                   |                  |
| 3  | bite_locations__3 | Inside the belly button                                                                                          |                                                                                                                                                                                                                                                                                                                                                                                                                                                                                                                                                                                                                                                                                                                       |   |                   |                |    |                   |            |   |                   |                 |   |                   |                         |   |                   |                     |   |                   |                   |   |                   |                  |   |                   |           |   |                   |                  |
| 4  | bite_locations__4 | Wrists                                                                                                           |                                                                                                                                                                                                                                                                                                                                                                                                                                                                                                                                                                                                                                                                                                                       |   |                   |                |    |                   |            |   |                   |                 |   |                   |                         |   |                   |                     |   |                   |                   |   |                   |                  |   |                   |           |   |                   |                  |
| 5  | bite_locations__5 | Back of the knees                                                                                                |                                                                                                                                                                                                                                                                                                                                                                                                                                                                                                                                                                                                                                                                                                                       |   |                   |                |    |                   |            |   |                   |                 |   |                   |                         |   |                   |                     |   |                   |                   |   |                   |                  |   |                   |           |   |                   |                  |
| 6  | bite_locations__6 | Between the legs                                                                                                 |                                                                                                                                                                                                                                                                                                                                                                                                                                                                                                                                                                                                                                                                                                                       |   |                   |                |    |                   |            |   |                   |                 |   |                   |                         |   |                   |                     |   |                   |                   |   |                   |                  |   |                   |           |   |                   |                  |
| 7  | bite_locations__7 | Shoulders                                                                                                        |                                                                                                                                                                                                                                                                                                                                                                                                                                                                                                                                                                                                                                                                                                                       |   |                   |                |    |                   |            |   |                   |                 |   |                   |                         |   |                   |                     |   |                   |                   |   |                   |                  |   |                   |           |   |                   |                  |
| 8  | bite_locations__8 | Around the waist                                                                                                 |                                                                                                                                                                                                                                                                                                                                                                                                                                                                                                                                                                                                                                                                                                                       |   |                   |                |    |                   |            |   |                   |                 |   |                   |                         |   |                   |                     |   |                   |                   |   |                   |                  |   |                   |           |   |                   |                  |
| 21 | diseases_present  | Please list any tick-borne diseases that are present in your area. If you feel there are none, please type N/A.  | notes                                                                                                                                                                                                                                                                                                                                                                                                                                                                                                                                                                                                                                                                                                                 |   |                   |                |    |                   |            |   |                   |                 |   |                   |                         |   |                   |                     |   |                   |                   |   |                   |                  |   |                   |           |   |                   |                  |

|    |                                                                                    |                                                                                                                                                                                                                                                                                                                                                                                                                                                  |                                                                                                                                                                                                                                                                                                                                                                                                                                                                                                                                                                                                                                                                                                                                                                                                                                                                                                                                                                                                                                                                                                                                 |   |                           |              |   |                           |            |   |                           |                    |   |                           |              |   |                           |               |   |                           |              |   |                           |                 |   |                           |                  |   |                           |               |   |                           |                              |    |                            |                                               |    |                            |           |
|----|------------------------------------------------------------------------------------|--------------------------------------------------------------------------------------------------------------------------------------------------------------------------------------------------------------------------------------------------------------------------------------------------------------------------------------------------------------------------------------------------------------------------------------------------|---------------------------------------------------------------------------------------------------------------------------------------------------------------------------------------------------------------------------------------------------------------------------------------------------------------------------------------------------------------------------------------------------------------------------------------------------------------------------------------------------------------------------------------------------------------------------------------------------------------------------------------------------------------------------------------------------------------------------------------------------------------------------------------------------------------------------------------------------------------------------------------------------------------------------------------------------------------------------------------------------------------------------------------------------------------------------------------------------------------------------------|---|---------------------------|--------------|---|---------------------------|------------|---|---------------------------|--------------------|---|---------------------------|--------------|---|---------------------------|---------------|---|---------------------------|--------------|---|---------------------------|-----------------|---|---------------------------|------------------|---|---------------------------|---------------|---|---------------------------|------------------------------|----|----------------------------|-----------------------------------------------|----|----------------------------|-----------|
| 22 | test_positive_diseases                                                             | Please indicate tick-borne diseases for which you have had patients test positive in the past two years. In the following questions please estimate the number of cases that are test confirmed that you have seen. Please limit your response to those cases occurring in the past two years. (Please select all that apply and take your best guess if you cannot recall exactly how many cases of each disease have appeared in your clinic). | checkbox, Required <table border="1" data-bbox="1354 123 1995 902"> <tr> <td>0</td> <td>test_positive_diseases__0</td> <td>Anaplasmosis</td> </tr> <tr> <td>1</td> <td>test_positive_diseases__1</td> <td>Babesiosis</td> </tr> <tr> <td>2</td> <td>test_positive_diseases__2</td> <td>Borrelia miyamotoi</td> </tr> <tr> <td>3</td> <td>test_positive_diseases__3</td> <td>Lyme disease</td> </tr> <tr> <td>4</td> <td>test_positive_diseases__4</td> <td>Bourbon virus</td> </tr> <tr> <td>5</td> <td>test_positive_diseases__5</td> <td>Ehrlichiosis</td> </tr> <tr> <td>6</td> <td>test_positive_diseases__6</td> <td>Heartland virus</td> </tr> <tr> <td>7</td> <td>test_positive_diseases__7</td> <td>Powassan disease</td> </tr> <tr> <td>8</td> <td>test_positive_diseases__8</td> <td>Rickettsiosis</td> </tr> <tr> <td>9</td> <td>test_positive_diseases__9</td> <td>Rocky Mountain Spotted Fever</td> </tr> <tr> <td>10</td> <td>test_positive_diseases__10</td> <td>Southern Tick Associated Rash Illness (STARI)</td> </tr> <tr> <td>11</td> <td>test_positive_diseases__11</td> <td>Tularemia</td> </tr> </table> | 0 | test_positive_diseases__0 | Anaplasmosis | 1 | test_positive_diseases__1 | Babesiosis | 2 | test_positive_diseases__2 | Borrelia miyamotoi | 3 | test_positive_diseases__3 | Lyme disease | 4 | test_positive_diseases__4 | Bourbon virus | 5 | test_positive_diseases__5 | Ehrlichiosis | 6 | test_positive_diseases__6 | Heartland virus | 7 | test_positive_diseases__7 | Powassan disease | 8 | test_positive_diseases__8 | Rickettsiosis | 9 | test_positive_diseases__9 | Rocky Mountain Spotted Fever | 10 | test_positive_diseases__10 | Southern Tick Associated Rash Illness (STARI) | 11 | test_positive_diseases__11 | Tularemia |
| 0  | test_positive_diseases__0                                                          | Anaplasmosis                                                                                                                                                                                                                                                                                                                                                                                                                                     |                                                                                                                                                                                                                                                                                                                                                                                                                                                                                                                                                                                                                                                                                                                                                                                                                                                                                                                                                                                                                                                                                                                                 |   |                           |              |   |                           |            |   |                           |                    |   |                           |              |   |                           |               |   |                           |              |   |                           |                 |   |                           |                  |   |                           |               |   |                           |                              |    |                            |                                               |    |                            |           |
| 1  | test_positive_diseases__1                                                          | Babesiosis                                                                                                                                                                                                                                                                                                                                                                                                                                       |                                                                                                                                                                                                                                                                                                                                                                                                                                                                                                                                                                                                                                                                                                                                                                                                                                                                                                                                                                                                                                                                                                                                 |   |                           |              |   |                           |            |   |                           |                    |   |                           |              |   |                           |               |   |                           |              |   |                           |                 |   |                           |                  |   |                           |               |   |                           |                              |    |                            |                                               |    |                            |           |
| 2  | test_positive_diseases__2                                                          | Borrelia miyamotoi                                                                                                                                                                                                                                                                                                                                                                                                                               |                                                                                                                                                                                                                                                                                                                                                                                                                                                                                                                                                                                                                                                                                                                                                                                                                                                                                                                                                                                                                                                                                                                                 |   |                           |              |   |                           |            |   |                           |                    |   |                           |              |   |                           |               |   |                           |              |   |                           |                 |   |                           |                  |   |                           |               |   |                           |                              |    |                            |                                               |    |                            |           |
| 3  | test_positive_diseases__3                                                          | Lyme disease                                                                                                                                                                                                                                                                                                                                                                                                                                     |                                                                                                                                                                                                                                                                                                                                                                                                                                                                                                                                                                                                                                                                                                                                                                                                                                                                                                                                                                                                                                                                                                                                 |   |                           |              |   |                           |            |   |                           |                    |   |                           |              |   |                           |               |   |                           |              |   |                           |                 |   |                           |                  |   |                           |               |   |                           |                              |    |                            |                                               |    |                            |           |
| 4  | test_positive_diseases__4                                                          | Bourbon virus                                                                                                                                                                                                                                                                                                                                                                                                                                    |                                                                                                                                                                                                                                                                                                                                                                                                                                                                                                                                                                                                                                                                                                                                                                                                                                                                                                                                                                                                                                                                                                                                 |   |                           |              |   |                           |            |   |                           |                    |   |                           |              |   |                           |               |   |                           |              |   |                           |                 |   |                           |                  |   |                           |               |   |                           |                              |    |                            |                                               |    |                            |           |
| 5  | test_positive_diseases__5                                                          | Ehrlichiosis                                                                                                                                                                                                                                                                                                                                                                                                                                     |                                                                                                                                                                                                                                                                                                                                                                                                                                                                                                                                                                                                                                                                                                                                                                                                                                                                                                                                                                                                                                                                                                                                 |   |                           |              |   |                           |            |   |                           |                    |   |                           |              |   |                           |               |   |                           |              |   |                           |                 |   |                           |                  |   |                           |               |   |                           |                              |    |                            |                                               |    |                            |           |
| 6  | test_positive_diseases__6                                                          | Heartland virus                                                                                                                                                                                                                                                                                                                                                                                                                                  |                                                                                                                                                                                                                                                                                                                                                                                                                                                                                                                                                                                                                                                                                                                                                                                                                                                                                                                                                                                                                                                                                                                                 |   |                           |              |   |                           |            |   |                           |                    |   |                           |              |   |                           |               |   |                           |              |   |                           |                 |   |                           |                  |   |                           |               |   |                           |                              |    |                            |                                               |    |                            |           |
| 7  | test_positive_diseases__7                                                          | Powassan disease                                                                                                                                                                                                                                                                                                                                                                                                                                 |                                                                                                                                                                                                                                                                                                                                                                                                                                                                                                                                                                                                                                                                                                                                                                                                                                                                                                                                                                                                                                                                                                                                 |   |                           |              |   |                           |            |   |                           |                    |   |                           |              |   |                           |               |   |                           |              |   |                           |                 |   |                           |                  |   |                           |               |   |                           |                              |    |                            |                                               |    |                            |           |
| 8  | test_positive_diseases__8                                                          | Rickettsiosis                                                                                                                                                                                                                                                                                                                                                                                                                                    |                                                                                                                                                                                                                                                                                                                                                                                                                                                                                                                                                                                                                                                                                                                                                                                                                                                                                                                                                                                                                                                                                                                                 |   |                           |              |   |                           |            |   |                           |                    |   |                           |              |   |                           |               |   |                           |              |   |                           |                 |   |                           |                  |   |                           |               |   |                           |                              |    |                            |                                               |    |                            |           |
| 9  | test_positive_diseases__9                                                          | Rocky Mountain Spotted Fever                                                                                                                                                                                                                                                                                                                                                                                                                     |                                                                                                                                                                                                                                                                                                                                                                                                                                                                                                                                                                                                                                                                                                                                                                                                                                                                                                                                                                                                                                                                                                                                 |   |                           |              |   |                           |            |   |                           |                    |   |                           |              |   |                           |               |   |                           |              |   |                           |                 |   |                           |                  |   |                           |               |   |                           |                              |    |                            |                                               |    |                            |           |
| 10 | test_positive_diseases__10                                                         | Southern Tick Associated Rash Illness (STARI)                                                                                                                                                                                                                                                                                                                                                                                                    |                                                                                                                                                                                                                                                                                                                                                                                                                                                                                                                                                                                                                                                                                                                                                                                                                                                                                                                                                                                                                                                                                                                                 |   |                           |              |   |                           |            |   |                           |                    |   |                           |              |   |                           |               |   |                           |              |   |                           |                 |   |                           |                  |   |                           |               |   |                           |                              |    |                            |                                               |    |                            |           |
| 11 | test_positive_diseases__11                                                         | Tularemia                                                                                                                                                                                                                                                                                                                                                                                                                                        |                                                                                                                                                                                                                                                                                                                                                                                                                                                                                                                                                                                                                                                                                                                                                                                                                                                                                                                                                                                                                                                                                                                                 |   |                           |              |   |                           |            |   |                           |                    |   |                           |              |   |                           |               |   |                           |              |   |                           |                 |   |                           |                  |   |                           |               |   |                           |                              |    |                            |                                               |    |                            |           |
| 23 | anaplasmosis<br>Show the field ONLY if:<br>[test_positive_diseases(0)] = '1'       | Cases of anaplasmosis:                                                                                                                                                                                                                                                                                                                                                                                                                           | text (number)                                                                                                                                                                                                                                                                                                                                                                                                                                                                                                                                                                                                                                                                                                                                                                                                                                                                                                                                                                                                                                                                                                                   |   |                           |              |   |                           |            |   |                           |                    |   |                           |              |   |                           |               |   |                           |              |   |                           |                 |   |                           |                  |   |                           |               |   |                           |                              |    |                            |                                               |    |                            |           |
| 24 | babesiosis<br>Show the field ONLY if:<br>[test_positive_diseases(1)] = '1'         | Cases of babesiosis:                                                                                                                                                                                                                                                                                                                                                                                                                             | text (number)                                                                                                                                                                                                                                                                                                                                                                                                                                                                                                                                                                                                                                                                                                                                                                                                                                                                                                                                                                                                                                                                                                                   |   |                           |              |   |                           |            |   |                           |                    |   |                           |              |   |                           |               |   |                           |              |   |                           |                 |   |                           |                  |   |                           |               |   |                           |                              |    |                            |                                               |    |                            |           |
| 25 | borrelia_miyamotoi<br>Show the field ONLY if:<br>[test_positive_diseases(2)] = '1' | Cases of Borrelia miyamotoi:                                                                                                                                                                                                                                                                                                                                                                                                                     | text (number)                                                                                                                                                                                                                                                                                                                                                                                                                                                                                                                                                                                                                                                                                                                                                                                                                                                                                                                                                                                                                                                                                                                   |   |                           |              |   |                           |            |   |                           |                    |   |                           |              |   |                           |               |   |                           |              |   |                           |                 |   |                           |                  |   |                           |               |   |                           |                              |    |                            |                                               |    |                            |           |

|    |                                                                                     |                                                         |               |
|----|-------------------------------------------------------------------------------------|---------------------------------------------------------|---------------|
| 26 | lyme<br>Show the field ONLY if:<br>[test_positive_diseases(3)] =<br>'1'             | Cases of Lyme disease:                                  | text (number) |
| 27 | bourbon_virus<br>Show the field ONLY if:<br>[test_positive_diseases(4)] =<br>'1'    | Cases of Bourbon virus:                                 | text (number) |
| 28 | ehrlichiosis<br>Show the field ONLY if:<br>[test_positive_diseases(5)] =<br>'1'     | Cases of ehrlichiosis:                                  | text (number) |
| 29 | heartland_virus<br>Show the field ONLY if:<br>[test_positive_diseases(6)] =<br>'1'  | Cases of Heartland virus:                               | text (number) |
| 30 | powassan_disease<br>Show the field ONLY if:<br>[test_positive_diseases(7)] =<br>'1' | Cases of Powassan disease:                              | text (number) |
| 31 | rickettsiosis<br>Show the field ONLY if:<br>[test_positive_diseases(8)] =<br>'1'    | Cases of rickettsiosis:                                 | text (number) |
| 32 | rmsf<br>Show the field ONLY if:<br>[test_positive_diseases(9)] =<br>'1'             | Cases of Rocky Mountain Spotted Fever:                  | text (number) |
| 33 | stari<br>Show the field ONLY if:<br>[test_positive_diseases(10)] =<br>'1'           | Cases of Southern Tick Associated Rash Illness (STARI): | text (number) |



|    |                                                                            |                                                                                                 |                                                                                                                                                                                                                                                                                                                                                                                            |   |                 |                                  |   |                 |                        |   |                 |                          |   |                 |                                   |   |             |                   |
|----|----------------------------------------------------------------------------|-------------------------------------------------------------------------------------------------|--------------------------------------------------------------------------------------------------------------------------------------------------------------------------------------------------------------------------------------------------------------------------------------------------------------------------------------------------------------------------------------------|---|-----------------|----------------------------------|---|-----------------|------------------------|---|-----------------|--------------------------|---|-----------------|-----------------------------------|---|-------------|-------------------|
| 34 | tularemia<br>Show the field ONLY if:<br>[test_positive_diseases(11)] = '1' | Cases of tularemia:                                                                             | text (number)                                                                                                                                                                                                                                                                                                                                                                              |   |                 |                                  |   |                 |                        |   |                 |                          |   |                 |                                   |   |             |                   |
| 35 | symptoms                                                                   | What are symptoms of tick-borne disease? (Please select all that apply).                        | checkbox<br><table border="1"> <tr> <td>1</td> <td>symptoms__1</td> <td>Fever</td> </tr> <tr> <td>2</td> <td>symptoms__2</td> <td>Hair loss</td> </tr> <tr> <td>3</td> <td>symptoms__3</td> <td>Joint pain</td> </tr> <tr> <td>4</td> <td>symptoms__4</td> <td>Rash</td> </tr> <tr> <td>5</td> <td>symptoms__5</td> <td>None of the above</td> </tr> </table>                              | 1 | symptoms__1     | Fever                            | 2 | symptoms__2     | Hair loss              | 3 | symptoms__3     | Joint pain               | 4 | symptoms__4     | Rash                              | 5 | symptoms__5 | None of the above |
| 1  | symptoms__1                                                                | Fever                                                                                           |                                                                                                                                                                                                                                                                                                                                                                                            |   |                 |                                  |   |                 |                        |   |                 |                          |   |                 |                                   |   |             |                   |
| 2  | symptoms__2                                                                | Hair loss                                                                                       |                                                                                                                                                                                                                                                                                                                                                                                            |   |                 |                                  |   |                 |                        |   |                 |                          |   |                 |                                   |   |             |                   |
| 3  | symptoms__3                                                                | Joint pain                                                                                      |                                                                                                                                                                                                                                                                                                                                                                                            |   |                 |                                  |   |                 |                        |   |                 |                          |   |                 |                                   |   |             |                   |
| 4  | symptoms__4                                                                | Rash                                                                                            |                                                                                                                                                                                                                                                                                                                                                                                            |   |                 |                                  |   |                 |                        |   |                 |                          |   |                 |                                   |   |             |                   |
| 5  | symptoms__5                                                                | None of the above                                                                               |                                                                                                                                                                                                                                                                                                                                                                                            |   |                 |                                  |   |                 |                        |   |                 |                          |   |                 |                                   |   |             |                   |
| 36 | risk_factors                                                               | What are risk factors for tick-borne diseases? (Please select as many as you feel apply).       | checkbox<br><table border="1"> <tr> <td>1</td> <td>risk_factors__1</td> <td>Working outdoors in wooded areas</td> </tr> <tr> <td>2</td> <td>risk_factors__2</td> <td>Being bitten by a tick</td> </tr> <tr> <td>3</td> <td>risk_factors__3</td> <td>Working of a golf course</td> </tr> <tr> <td>4</td> <td>risk_factors__4</td> <td>Having a tall un-mowed grass lawn</td> </tr> </table> | 1 | risk_factors__1 | Working outdoors in wooded areas | 2 | risk_factors__2 | Being bitten by a tick | 3 | risk_factors__3 | Working of a golf course | 4 | risk_factors__4 | Having a tall un-mowed grass lawn |   |             |                   |
| 1  | risk_factors__1                                                            | Working outdoors in wooded areas                                                                |                                                                                                                                                                                                                                                                                                                                                                                            |   |                 |                                  |   |                 |                        |   |                 |                          |   |                 |                                   |   |             |                   |
| 2  | risk_factors__2                                                            | Being bitten by a tick                                                                          |                                                                                                                                                                                                                                                                                                                                                                                            |   |                 |                                  |   |                 |                        |   |                 |                          |   |                 |                                   |   |             |                   |
| 3  | risk_factors__3                                                            | Working of a golf course                                                                        |                                                                                                                                                                                                                                                                                                                                                                                            |   |                 |                                  |   |                 |                        |   |                 |                          |   |                 |                                   |   |             |                   |
| 4  | risk_factors__4                                                            | Having a tall un-mowed grass lawn                                                               |                                                                                                                                                                                                                                                                                                                                                                                            |   |                 |                                  |   |                 |                        |   |                 |                          |   |                 |                                   |   |             |                   |
| 37 | tests                                                                      | What tests are available to test for tick-borne diseases?                                       | notes                                                                                                                                                                                                                                                                                                                                                                                      |   |                 |                                  |   |                 |                        |   |                 |                          |   |                 |                                   |   |             |                   |
| 38 | test_preference                                                            | Which tests for tick-borne diseases do your prefer and why?                                     | notes                                                                                                                                                                                                                                                                                                                                                                                      |   |                 |                                  |   |                 |                        |   |                 |                          |   |                 |                                   |   |             |                   |
| 39 | samples                                                                    | What samples should be taken for the tests you mentioned above? (Please select all that apply). | checkbox<br><table border="1"> <tr> <td>1</td> <td>samples__1</td> <td>Serum</td> </tr> <tr> <td>2</td> <td>samples__2</td> <td>Blood</td> </tr> <tr> <td>3</td> <td>samples__3</td> <td>Joint fluid</td> </tr> <tr> <td>4</td> <td>samples__4</td> <td>Other</td> </tr> </table>                                                                                                          | 1 | samples__1      | Serum                            | 2 | samples__2      | Blood                  | 3 | samples__3      | Joint fluid              | 4 | samples__4      | Other                             |   |             |                   |
| 1  | samples__1                                                                 | Serum                                                                                           |                                                                                                                                                                                                                                                                                                                                                                                            |   |                 |                                  |   |                 |                        |   |                 |                          |   |                 |                                   |   |             |                   |
| 2  | samples__2                                                                 | Blood                                                                                           |                                                                                                                                                                                                                                                                                                                                                                                            |   |                 |                                  |   |                 |                        |   |                 |                          |   |                 |                                   |   |             |                   |
| 3  | samples__3                                                                 | Joint fluid                                                                                     |                                                                                                                                                                                                                                                                                                                                                                                            |   |                 |                                  |   |                 |                        |   |                 |                          |   |                 |                                   |   |             |                   |
| 4  | samples__4                                                                 | Other                                                                                           |                                                                                                                                                                                                                                                                                                                                                                                            |   |                 |                                  |   |                 |                        |   |                 |                          |   |                 |                                   |   |             |                   |
| 40 | sample_other<br>Show the field ONLY if:<br>[samples(4)] = '1'              | Please specify:                                                                                 | text                                                                                                                                                                                                                                                                                                                                                                                       |   |                 |                                  |   |                 |                        |   |                 |                          |   |                 |                                   |   |             |                   |
| 41 | treatments                                                                 | What treatments are available for tick-borne diseases?                                          | notes                                                                                                                                                                                                                                                                                                                                                                                      |   |                 |                                  |   |                 |                        |   |                 |                          |   |                 |                                   |   |             |                   |

|    |                             |                                                                                                                                                                                                            |                                                                                                                                                                                                                                                       |   |             |   |                             |   |                          |   |                     |
|----|-----------------------------|------------------------------------------------------------------------------------------------------------------------------------------------------------------------------------------------------------|-------------------------------------------------------------------------------------------------------------------------------------------------------------------------------------------------------------------------------------------------------|---|-------------|---|-----------------------------|---|--------------------------|---|---------------------|
| 42 | alpha_gal                   | Have you ever heard of the alpha-gal/red meat allergy?                                                                                                                                                     | yesno<br><table border="1"> <tr> <td>1</td> <td>Yes</td> </tr> <tr> <td>0</td> <td>No</td> </tr> </table>                                                                                                                                             | 1 | Yes         | 0 | No                          |   |                          |   |                     |
| 1  | Yes                         |                                                                                                                                                                                                            |                                                                                                                                                                                                                                                       |   |             |   |                             |   |                          |   |                     |
| 0  | No                          |                                                                                                                                                                                                            |                                                                                                                                                                                                                                                       |   |             |   |                             |   |                          |   |                     |
| 43 | alpha_gal_cause             | What causes the alpha-gal/ red meat allergy? (If you are uncertain, please give your best guess).                                                                                                          | notes                                                                                                                                                                                                                                                 |   |             |   |                             |   |                          |   |                     |
| 44 | alpha_gal_test              | Is there a test for the alpha-gal/red meat allergy?                                                                                                                                                        | yesno<br><table border="1"> <tr> <td>1</td> <td>Yes</td> </tr> <tr> <td>0</td> <td>No</td> </tr> </table>                                                                                                                                             | 1 | Yes         | 0 | No                          |   |                          |   |                     |
| 1  | Yes                         |                                                                                                                                                                                                            |                                                                                                                                                                                                                                                       |   |             |   |                             |   |                          |   |                     |
| 0  | No                          |                                                                                                                                                                                                            |                                                                                                                                                                                                                                                       |   |             |   |                             |   |                          |   |                     |
| 45 | alpha_gal_treatment         | How do you treat the alpha-gal/red meat allergy?                                                                                                                                                           | radio<br><table border="1"> <tr> <td>1</td> <td>Antibiotics</td> </tr> <tr> <td>2</td> <td>Monoclonal antibody therapy</td> </tr> <tr> <td>3</td> <td>Antigen stimulus therapy</td> </tr> <tr> <td>4</td> <td>There is no therapy</td> </tr> </table> | 1 | Antibiotics | 2 | Monoclonal antibody therapy | 3 | Antigen stimulus therapy | 4 | There is no therapy |
| 1  | Antibiotics                 |                                                                                                                                                                                                            |                                                                                                                                                                                                                                                       |   |             |   |                             |   |                          |   |                     |
| 2  | Monoclonal antibody therapy |                                                                                                                                                                                                            |                                                                                                                                                                                                                                                       |   |             |   |                             |   |                          |   |                     |
| 3  | Antigen stimulus therapy    |                                                                                                                                                                                                            |                                                                                                                                                                                                                                                       |   |             |   |                             |   |                          |   |                     |
| 4  | There is no therapy         |                                                                                                                                                                                                            |                                                                                                                                                                                                                                                       |   |             |   |                             |   |                          |   |                     |
| 46 | tick_concern                | Section Header: <i>Attitudes In this section, we would like to assess your opinions and how you feel about ticks and tick-borne diseases.</i><br><br>Do you believe that ticks are a concern in your area? | yesno<br><table border="1"> <tr> <td>1</td> <td>Yes</td> </tr> <tr> <td>0</td> <td>No</td> </tr> </table>                                                                                                                                             | 1 | Yes         | 0 | No                          |   |                          |   |                     |
| 1  | Yes                         |                                                                                                                                                                                                            |                                                                                                                                                                                                                                                       |   |             |   |                             |   |                          |   |                     |
| 0  | No                          |                                                                                                                                                                                                            |                                                                                                                                                                                                                                                       |   |             |   |                             |   |                          |   |                     |

|    |                                                                           |                                                                                                        |                                                                                                                                                                                                                                                                                                                                                                                                                                                                                                                                                                                                                                                                                                                                                                                                                                                                                                                                                                                                                                                                                                                                                                                                                                                                                                                                                                                                                                                                                                                                                                                                                            |   |                     |                                                       |    |                     |                                               |   |                     |                                           |   |                     |                                           |   |                     |                                                |   |                     |                                          |   |                     |          |   |                     |                |
|----|---------------------------------------------------------------------------|--------------------------------------------------------------------------------------------------------|----------------------------------------------------------------------------------------------------------------------------------------------------------------------------------------------------------------------------------------------------------------------------------------------------------------------------------------------------------------------------------------------------------------------------------------------------------------------------------------------------------------------------------------------------------------------------------------------------------------------------------------------------------------------------------------------------------------------------------------------------------------------------------------------------------------------------------------------------------------------------------------------------------------------------------------------------------------------------------------------------------------------------------------------------------------------------------------------------------------------------------------------------------------------------------------------------------------------------------------------------------------------------------------------------------------------------------------------------------------------------------------------------------------------------------------------------------------------------------------------------------------------------------------------------------------------------------------------------------------------------|---|---------------------|-------------------------------------------------------|----|---------------------|-----------------------------------------------|---|---------------------|-------------------------------------------|---|---------------------|-------------------------------------------|---|---------------------|------------------------------------------------|---|---------------------|------------------------------------------|---|---------------------|----------|---|---------------------|----------------|
| 47 | ticks_of_concern                                                          | Please indicate which ticks you believe are a concern. (Please select all that apply).                 | checkbox <table border="1" data-bbox="1354 121 1997 867"> <tr> <td data-bbox="1354 121 1392 245">1</td> <td data-bbox="1392 121 1661 245">ticks_of_concern__1</td> <td data-bbox="1661 121 1997 245">The Blacklegged tick or Deer Tick (Ixodes scapularis)</td> </tr> <tr> <td data-bbox="1354 245 1392 368">2</td> <td data-bbox="1392 245 1661 368">ticks_of_concern__2</td> <td data-bbox="1661 245 1997 368">The Brown Dog tick (Rhipicephalus sanguineus)</td> </tr> <tr> <td data-bbox="1354 368 1392 492">3</td> <td data-bbox="1392 368 1661 492">ticks_of_concern__3</td> <td data-bbox="1661 368 1997 492">The Gulf Coast tick (Amblyomma maculatum)</td> </tr> <tr> <td data-bbox="1354 492 1392 615">4</td> <td data-bbox="1392 492 1661 615">ticks_of_concern__4</td> <td data-bbox="1661 492 1997 615">The Lone Star tick (Amblyomma americanum)</td> </tr> <tr> <td data-bbox="1354 615 1392 738">5</td> <td data-bbox="1392 615 1661 738">ticks_of_concern__5</td> <td data-bbox="1661 615 1997 738">The American Dog tick (Dermacentor variabilis)</td> </tr> <tr> <td data-bbox="1354 738 1392 862">6</td> <td data-bbox="1392 738 1661 862">ticks_of_concern__6</td> <td data-bbox="1661 738 1997 862">The Winter tick (Dermacentor albipictus)</td> </tr> <tr> <td data-bbox="1354 862 1392 816">7</td> <td data-bbox="1392 862 1661 816">ticks_of_concern__7</td> <td data-bbox="1661 862 1997 816">Other(s)</td> </tr> <tr> <td data-bbox="1354 816 1392 867">8</td> <td data-bbox="1392 816 1661 867">ticks_of_concern__8</td> <td data-bbox="1661 816 1997 867">Not applicable</td> </tr> </table> | 1 | ticks_of_concern__1 | The Blacklegged tick or Deer Tick (Ixodes scapularis) | 2  | ticks_of_concern__2 | The Brown Dog tick (Rhipicephalus sanguineus) | 3 | ticks_of_concern__3 | The Gulf Coast tick (Amblyomma maculatum) | 4 | ticks_of_concern__4 | The Lone Star tick (Amblyomma americanum) | 5 | ticks_of_concern__5 | The American Dog tick (Dermacentor variabilis) | 6 | ticks_of_concern__6 | The Winter tick (Dermacentor albipictus) | 7 | ticks_of_concern__7 | Other(s) | 8 | ticks_of_concern__8 | Not applicable |
| 1  | ticks_of_concern__1                                                       | The Blacklegged tick or Deer Tick (Ixodes scapularis)                                                  |                                                                                                                                                                                                                                                                                                                                                                                                                                                                                                                                                                                                                                                                                                                                                                                                                                                                                                                                                                                                                                                                                                                                                                                                                                                                                                                                                                                                                                                                                                                                                                                                                            |   |                     |                                                       |    |                     |                                               |   |                     |                                           |   |                     |                                           |   |                     |                                                |   |                     |                                          |   |                     |          |   |                     |                |
| 2  | ticks_of_concern__2                                                       | The Brown Dog tick (Rhipicephalus sanguineus)                                                          |                                                                                                                                                                                                                                                                                                                                                                                                                                                                                                                                                                                                                                                                                                                                                                                                                                                                                                                                                                                                                                                                                                                                                                                                                                                                                                                                                                                                                                                                                                                                                                                                                            |   |                     |                                                       |    |                     |                                               |   |                     |                                           |   |                     |                                           |   |                     |                                                |   |                     |                                          |   |                     |          |   |                     |                |
| 3  | ticks_of_concern__3                                                       | The Gulf Coast tick (Amblyomma maculatum)                                                              |                                                                                                                                                                                                                                                                                                                                                                                                                                                                                                                                                                                                                                                                                                                                                                                                                                                                                                                                                                                                                                                                                                                                                                                                                                                                                                                                                                                                                                                                                                                                                                                                                            |   |                     |                                                       |    |                     |                                               |   |                     |                                           |   |                     |                                           |   |                     |                                                |   |                     |                                          |   |                     |          |   |                     |                |
| 4  | ticks_of_concern__4                                                       | The Lone Star tick (Amblyomma americanum)                                                              |                                                                                                                                                                                                                                                                                                                                                                                                                                                                                                                                                                                                                                                                                                                                                                                                                                                                                                                                                                                                                                                                                                                                                                                                                                                                                                                                                                                                                                                                                                                                                                                                                            |   |                     |                                                       |    |                     |                                               |   |                     |                                           |   |                     |                                           |   |                     |                                                |   |                     |                                          |   |                     |          |   |                     |                |
| 5  | ticks_of_concern__5                                                       | The American Dog tick (Dermacentor variabilis)                                                         |                                                                                                                                                                                                                                                                                                                                                                                                                                                                                                                                                                                                                                                                                                                                                                                                                                                                                                                                                                                                                                                                                                                                                                                                                                                                                                                                                                                                                                                                                                                                                                                                                            |   |                     |                                                       |    |                     |                                               |   |                     |                                           |   |                     |                                           |   |                     |                                                |   |                     |                                          |   |                     |          |   |                     |                |
| 6  | ticks_of_concern__6                                                       | The Winter tick (Dermacentor albipictus)                                                               |                                                                                                                                                                                                                                                                                                                                                                                                                                                                                                                                                                                                                                                                                                                                                                                                                                                                                                                                                                                                                                                                                                                                                                                                                                                                                                                                                                                                                                                                                                                                                                                                                            |   |                     |                                                       |    |                     |                                               |   |                     |                                           |   |                     |                                           |   |                     |                                                |   |                     |                                          |   |                     |          |   |                     |                |
| 7  | ticks_of_concern__7                                                       | Other(s)                                                                                               |                                                                                                                                                                                                                                                                                                                                                                                                                                                                                                                                                                                                                                                                                                                                                                                                                                                                                                                                                                                                                                                                                                                                                                                                                                                                                                                                                                                                                                                                                                                                                                                                                            |   |                     |                                                       |    |                     |                                               |   |                     |                                           |   |                     |                                           |   |                     |                                                |   |                     |                                          |   |                     |          |   |                     |                |
| 8  | ticks_of_concern__8                                                       | Not applicable                                                                                         |                                                                                                                                                                                                                                                                                                                                                                                                                                                                                                                                                                                                                                                                                                                                                                                                                                                                                                                                                                                                                                                                                                                                                                                                                                                                                                                                                                                                                                                                                                                                                                                                                            |   |                     |                                                       |    |                     |                                               |   |                     |                                           |   |                     |                                           |   |                     |                                                |   |                     |                                          |   |                     |          |   |                     |                |
| 48 | tick_other<br>Show the field ONLY if:<br>[ticks_of_concern(7)] = '1'      | Please specify:                                                                                        | text                                                                                                                                                                                                                                                                                                                                                                                                                                                                                                                                                                                                                                                                                                                                                                                                                                                                                                                                                                                                                                                                                                                                                                                                                                                                                                                                                                                                                                                                                                                                                                                                                       |   |                     |                                                       |    |                     |                                               |   |                     |                                           |   |                     |                                           |   |                     |                                                |   |                     |                                          |   |                     |          |   |                     |                |
| 49 | education_importance                                                      | Do you feel that client education about ticks and tick-borne diseases is important?                    | yesno<br><table border="1" data-bbox="1354 1065 1457 1175"> <tr> <td data-bbox="1354 1065 1392 1117">1</td> <td data-bbox="1392 1065 1457 1117">Yes</td> </tr> <tr> <td data-bbox="1354 1117 1392 1175">0</td> <td data-bbox="1392 1117 1457 1175">No</td> </tr> </table>                                                                                                                                                                                                                                                                                                                                                                                                                                                                                                                                                                                                                                                                                                                                                                                                                                                                                                                                                                                                                                                                                                                                                                                                                                                                                                                                                  | 1 | Yes                 | 0                                                     | No |                     |                                               |   |                     |                                           |   |                     |                                           |   |                     |                                                |   |                     |                                          |   |                     |          |   |                     |                |
| 1  | Yes                                                                       |                                                                                                        |                                                                                                                                                                                                                                                                                                                                                                                                                                                                                                                                                                                                                                                                                                                                                                                                                                                                                                                                                                                                                                                                                                                                                                                                                                                                                                                                                                                                                                                                                                                                                                                                                            |   |                     |                                                       |    |                     |                                               |   |                     |                                           |   |                     |                                           |   |                     |                                                |   |                     |                                          |   |                     |          |   |                     |                |
| 0  | No                                                                        |                                                                                                        |                                                                                                                                                                                                                                                                                                                                                                                                                                                                                                                                                                                                                                                                                                                                                                                                                                                                                                                                                                                                                                                                                                                                                                                                                                                                                                                                                                                                                                                                                                                                                                                                                            |   |                     |                                                       |    |                     |                                               |   |                     |                                           |   |                     |                                           |   |                     |                                                |   |                     |                                          |   |                     |          |   |                     |                |
| 50 | disease_concern                                                           | Do you think that tick-borne diseases are a concern in your area?                                      | yesno<br><table border="1" data-bbox="1354 1227 1457 1338"> <tr> <td data-bbox="1354 1227 1392 1279">1</td> <td data-bbox="1392 1227 1457 1279">Yes</td> </tr> <tr> <td data-bbox="1354 1279 1392 1338">0</td> <td data-bbox="1392 1279 1457 1338">No</td> </tr> </table>                                                                                                                                                                                                                                                                                                                                                                                                                                                                                                                                                                                                                                                                                                                                                                                                                                                                                                                                                                                                                                                                                                                                                                                                                                                                                                                                                  | 1 | Yes                 | 0                                                     | No |                     |                                               |   |                     |                                           |   |                     |                                           |   |                     |                                                |   |                     |                                          |   |                     |          |   |                     |                |
| 1  | Yes                                                                       |                                                                                                        |                                                                                                                                                                                                                                                                                                                                                                                                                                                                                                                                                                                                                                                                                                                                                                                                                                                                                                                                                                                                                                                                                                                                                                                                                                                                                                                                                                                                                                                                                                                                                                                                                            |   |                     |                                                       |    |                     |                                               |   |                     |                                           |   |                     |                                           |   |                     |                                                |   |                     |                                          |   |                     |          |   |                     |                |
| 0  | No                                                                        |                                                                                                        |                                                                                                                                                                                                                                                                                                                                                                                                                                                                                                                                                                                                                                                                                                                                                                                                                                                                                                                                                                                                                                                                                                                                                                                                                                                                                                                                                                                                                                                                                                                                                                                                                            |   |                     |                                                       |    |                     |                                               |   |                     |                                           |   |                     |                                           |   |                     |                                                |   |                     |                                          |   |                     |          |   |                     |                |
| 51 | diseases_of_concern<br>Show the field ONLY if:<br>[disease_concern] = '1' | If you selected "Yes" above, please list the tick-borne diseases you are concerned about in your area. | notes                                                                                                                                                                                                                                                                                                                                                                                                                                                                                                                                                                                                                                                                                                                                                                                                                                                                                                                                                                                                                                                                                                                                                                                                                                                                                                                                                                                                                                                                                                                                                                                                                      |   |                     |                                                       |    |                     |                                               |   |                     |                                           |   |                     |                                           |   |                     |                                                |   |                     |                                          |   |                     |          |   |                     |                |

|    |                                                                         |                                                                                                                                                                                                                                        |                                                                                                                                                                                                                                                                                                                                                                                                                                                                                                                                                                                                                                                                  |   |                    |                                             |    |                    |                                                |   |                    |                                  |   |                    |                                 |   |                    |                                  |   |                    |                                                           |   |                    |       |
|----|-------------------------------------------------------------------------|----------------------------------------------------------------------------------------------------------------------------------------------------------------------------------------------------------------------------------------|------------------------------------------------------------------------------------------------------------------------------------------------------------------------------------------------------------------------------------------------------------------------------------------------------------------------------------------------------------------------------------------------------------------------------------------------------------------------------------------------------------------------------------------------------------------------------------------------------------------------------------------------------------------|---|--------------------|---------------------------------------------|----|--------------------|------------------------------------------------|---|--------------------|----------------------------------|---|--------------------|---------------------------------|---|--------------------|----------------------------------|---|--------------------|-----------------------------------------------------------|---|--------------------|-------|
| 52 | training_yn                                                             | Would you like to have training on ticks and tick-borne diseases?                                                                                                                                                                      | yesno<br><table border="1"> <tr> <td>1</td> <td>Yes</td> </tr> <tr> <td>0</td> <td>No</td> </tr> </table>                                                                                                                                                                                                                                                                                                                                                                                                                                                                                                                                                        | 1 | Yes                | 0                                           | No |                    |                                                |   |                    |                                  |   |                    |                                 |   |                    |                                  |   |                    |                                                           |   |                    |       |
| 1  | Yes                                                                     |                                                                                                                                                                                                                                        |                                                                                                                                                                                                                                                                                                                                                                                                                                                                                                                                                                                                                                                                  |   |                    |                                             |    |                    |                                                |   |                    |                                  |   |                    |                                 |   |                    |                                  |   |                    |                                                           |   |                    |       |
| 0  | No                                                                      |                                                                                                                                                                                                                                        |                                                                                                                                                                                                                                                                                                                                                                                                                                                                                                                                                                                                                                                                  |   |                    |                                             |    |                    |                                                |   |                    |                                  |   |                    |                                 |   |                    |                                  |   |                    |                                                           |   |                    |       |
| 53 | training_topics                                                         | What tick and tick-borne disease topics would you like further training in? (Please select all that apply).                                                                                                                            | checkbox<br><table border="1"> <tr> <td>1</td> <td>training_topics__1</td> <td>Tick species</td> </tr> <tr> <td>2</td> <td>training_topics__2</td> <td>Tick removal</td> </tr> <tr> <td>3</td> <td>training_topics__3</td> <td>Tick-borne diseases in your area</td> </tr> <tr> <td>4</td> <td>training_topics__4</td> <td>Testing for tick-borne diseases</td> </tr> <tr> <td>5</td> <td>training_topics__5</td> <td>Treatment of tick-borne diseases</td> </tr> <tr> <td>6</td> <td>training_topics__6</td> <td>Community outreach/communication about ticks and diseases</td> </tr> <tr> <td>7</td> <td>training_topics__7</td> <td>Other</td> </tr> </table> | 1 | training_topics__1 | Tick species                                | 2  | training_topics__2 | Tick removal                                   | 3 | training_topics__3 | Tick-borne diseases in your area | 4 | training_topics__4 | Testing for tick-borne diseases | 5 | training_topics__5 | Treatment of tick-borne diseases | 6 | training_topics__6 | Community outreach/communication about ticks and diseases | 7 | training_topics__7 | Other |
| 1  | training_topics__1                                                      | Tick species                                                                                                                                                                                                                           |                                                                                                                                                                                                                                                                                                                                                                                                                                                                                                                                                                                                                                                                  |   |                    |                                             |    |                    |                                                |   |                    |                                  |   |                    |                                 |   |                    |                                  |   |                    |                                                           |   |                    |       |
| 2  | training_topics__2                                                      | Tick removal                                                                                                                                                                                                                           |                                                                                                                                                                                                                                                                                                                                                                                                                                                                                                                                                                                                                                                                  |   |                    |                                             |    |                    |                                                |   |                    |                                  |   |                    |                                 |   |                    |                                  |   |                    |                                                           |   |                    |       |
| 3  | training_topics__3                                                      | Tick-borne diseases in your area                                                                                                                                                                                                       |                                                                                                                                                                                                                                                                                                                                                                                                                                                                                                                                                                                                                                                                  |   |                    |                                             |    |                    |                                                |   |                    |                                  |   |                    |                                 |   |                    |                                  |   |                    |                                                           |   |                    |       |
| 4  | training_topics__4                                                      | Testing for tick-borne diseases                                                                                                                                                                                                        |                                                                                                                                                                                                                                                                                                                                                                                                                                                                                                                                                                                                                                                                  |   |                    |                                             |    |                    |                                                |   |                    |                                  |   |                    |                                 |   |                    |                                  |   |                    |                                                           |   |                    |       |
| 5  | training_topics__5                                                      | Treatment of tick-borne diseases                                                                                                                                                                                                       |                                                                                                                                                                                                                                                                                                                                                                                                                                                                                                                                                                                                                                                                  |   |                    |                                             |    |                    |                                                |   |                    |                                  |   |                    |                                 |   |                    |                                  |   |                    |                                                           |   |                    |       |
| 6  | training_topics__6                                                      | Community outreach/communication about ticks and diseases                                                                                                                                                                              |                                                                                                                                                                                                                                                                                                                                                                                                                                                                                                                                                                                                                                                                  |   |                    |                                             |    |                    |                                                |   |                    |                                  |   |                    |                                 |   |                    |                                  |   |                    |                                                           |   |                    |       |
| 7  | training_topics__7                                                      | Other                                                                                                                                                                                                                                  |                                                                                                                                                                                                                                                                                                                                                                                                                                                                                                                                                                                                                                                                  |   |                    |                                             |    |                    |                                                |   |                    |                                  |   |                    |                                 |   |                    |                                  |   |                    |                                                           |   |                    |       |
| 54 | training_other<br>Show the field ONLY if:<br>[training_topics(7)] = '1' | Please specify:                                                                                                                                                                                                                        | notes                                                                                                                                                                                                                                                                                                                                                                                                                                                                                                                                                                                                                                                            |   |                    |                                             |    |                    |                                                |   |                    |                                  |   |                    |                                 |   |                    |                                  |   |                    |                                                           |   |                    |       |
| 55 | public_outreach                                                         | Do you feel like more public outreach about ticks and tick-borne diseases from the Illinois Department of Public Health (IDPH), American Veterinary Medical Association (AVMA), or the University of Illinois would benefit your area? | yesno<br><table border="1"> <tr> <td>1</td> <td>Yes</td> </tr> <tr> <td>0</td> <td>No</td> </tr> </table>                                                                                                                                                                                                                                                                                                                                                                                                                                                                                                                                                        | 1 | Yes                | 0                                           | No |                    |                                                |   |                    |                                  |   |                    |                                 |   |                    |                                  |   |                    |                                                           |   |                    |       |
| 1  | Yes                                                                     |                                                                                                                                                                                                                                        |                                                                                                                                                                                                                                                                                                                                                                                                                                                                                                                                                                                                                                                                  |   |                    |                                             |    |                    |                                                |   |                    |                                  |   |                    |                                 |   |                    |                                  |   |                    |                                                           |   |                    |       |
| 0  | No                                                                      |                                                                                                                                                                                                                                        |                                                                                                                                                                                                                                                                                                                                                                                                                                                                                                                                                                                                                                                                  |   |                    |                                             |    |                    |                                                |   |                    |                                  |   |                    |                                 |   |                    |                                  |   |                    |                                                           |   |                    |       |
| 56 | outreach_agency                                                         | Who would you like to receive public outreach from?                                                                                                                                                                                    | checkbox<br><table border="1"> <tr> <td>1</td> <td>outreach_agency__1</td> <td>Illinois Department of Public Health (IDPH)</td> </tr> <tr> <td>2</td> <td>outreach_agency__2</td> <td>American Veterinary Medical Association (AVMA)</td> </tr> <tr> <td>3</td> <td>outreach_agency__3</td> <td>The University of Illinois</td> </tr> <tr> <td>4</td> <td>outreach_agency__4</td> <td>Other</td> </tr> </table>                                                                                                                                                                                                                                                  | 1 | outreach_agency__1 | Illinois Department of Public Health (IDPH) | 2  | outreach_agency__2 | American Veterinary Medical Association (AVMA) | 3 | outreach_agency__3 | The University of Illinois       | 4 | outreach_agency__4 | Other                           |   |                    |                                  |   |                    |                                                           |   |                    |       |
| 1  | outreach_agency__1                                                      | Illinois Department of Public Health (IDPH)                                                                                                                                                                                            |                                                                                                                                                                                                                                                                                                                                                                                                                                                                                                                                                                                                                                                                  |   |                    |                                             |    |                    |                                                |   |                    |                                  |   |                    |                                 |   |                    |                                  |   |                    |                                                           |   |                    |       |
| 2  | outreach_agency__2                                                      | American Veterinary Medical Association (AVMA)                                                                                                                                                                                         |                                                                                                                                                                                                                                                                                                                                                                                                                                                                                                                                                                                                                                                                  |   |                    |                                             |    |                    |                                                |   |                    |                                  |   |                    |                                 |   |                    |                                  |   |                    |                                                           |   |                    |       |
| 3  | outreach_agency__3                                                      | The University of Illinois                                                                                                                                                                                                             |                                                                                                                                                                                                                                                                                                                                                                                                                                                                                                                                                                                                                                                                  |   |                    |                                             |    |                    |                                                |   |                    |                                  |   |                    |                                 |   |                    |                                  |   |                    |                                                           |   |                    |       |
| 4  | outreach_agency__4                                                      | Other                                                                                                                                                                                                                                  |                                                                                                                                                                                                                                                                                                                                                                                                                                                                                                                                                                                                                                                                  |   |                    |                                             |    |                    |                                                |   |                    |                                  |   |                    |                                 |   |                    |                                  |   |                    |                                                           |   |                    |       |

|    |                                                                         |                                                                                                                                                                                                                       |                                                                                                                                                                                                                                                                                                                                                                                                                                                                                                                                                                                                                                                                                                                                                                                                                                                                              |   |                  |                                                                |    |                  |                                                        |   |                  |                                                    |   |                  |                                                    |   |                  |                                                         |   |                  |                                                   |   |                  |        |   |                  |                             |
|----|-------------------------------------------------------------------------|-----------------------------------------------------------------------------------------------------------------------------------------------------------------------------------------------------------------------|------------------------------------------------------------------------------------------------------------------------------------------------------------------------------------------------------------------------------------------------------------------------------------------------------------------------------------------------------------------------------------------------------------------------------------------------------------------------------------------------------------------------------------------------------------------------------------------------------------------------------------------------------------------------------------------------------------------------------------------------------------------------------------------------------------------------------------------------------------------------------|---|------------------|----------------------------------------------------------------|----|------------------|--------------------------------------------------------|---|------------------|----------------------------------------------------|---|------------------|----------------------------------------------------|---|------------------|---------------------------------------------------------|---|------------------|---------------------------------------------------|---|------------------|--------|---|------------------|-----------------------------|
| 57 | outreach_other<br>Show the field ONLY if:<br>[outreach_agency(4)] = '1' | Please specify:                                                                                                                                                                                                       | text                                                                                                                                                                                                                                                                                                                                                                                                                                                                                                                                                                                                                                                                                                                                                                                                                                                                         |   |                  |                                                                |    |                  |                                                        |   |                  |                                                    |   |                  |                                                    |   |                  |                                                         |   |                  |                                                   |   |                  |        |   |                  |                             |
| 58 | look_for_ticks                                                          | Section Header: <i>Practices For this section, we would like to gain knowledge of your current practices regarding ticks and tick-borne diseases.</i><br>Do you routinely look for ticks on yourself and/or patients? | yesno<br><table border="1"> <tr> <td>1</td> <td>Yes</td> </tr> <tr> <td>0</td> <td>No</td> </tr> </table>                                                                                                                                                                                                                                                                                                                                                                                                                                                                                                                                                                                                                                                                                                                                                                    | 1 | Yes              | 0                                                              | No |                  |                                                        |   |                  |                                                    |   |                  |                                                    |   |                  |                                                         |   |                  |                                                   |   |                  |        |   |                  |                             |
| 1  | Yes                                                                     |                                                                                                                                                                                                                       |                                                                                                                                                                                                                                                                                                                                                                                                                                                                                                                                                                                                                                                                                                                                                                                                                                                                              |   |                  |                                                                |    |                  |                                                        |   |                  |                                                    |   |                  |                                                    |   |                  |                                                         |   |                  |                                                   |   |                  |        |   |                  |                             |
| 0  | No                                                                      |                                                                                                                                                                                                                       |                                                                                                                                                                                                                                                                                                                                                                                                                                                                                                                                                                                                                                                                                                                                                                                                                                                                              |   |                  |                                                                |    |                  |                                                        |   |                  |                                                    |   |                  |                                                    |   |                  |                                                         |   |                  |                                                   |   |                  |        |   |                  |                             |
| 59 | ticks_removed                                                           | If you have removed ticks from yourself and/or your patients, what species of tick have you found? (Please select as many as apply).                                                                                  | checkbox<br><table border="1"> <tr> <td>1</td> <td>ticks_removed__1</td> <td>The Blacklegged tick or Deer Tick (<i>Ixodes scapularis</i>)</td> </tr> <tr> <td>2</td> <td>ticks_removed__2</td> <td>The Brown Dog tick (<i>Rhipicephalus sanguineus</i>)</td> </tr> <tr> <td>3</td> <td>ticks_removed__3</td> <td>The Gulf Coast tick (<i>Amblyomma maculatum</i>)</td> </tr> <tr> <td>4</td> <td>ticks_removed__4</td> <td>The Lone Star tick (<i>Amblyomma americanum</i>)</td> </tr> <tr> <td>5</td> <td>ticks_removed__5</td> <td>The American Dog tick (<i>Dermacentor variabilis</i>)</td> </tr> <tr> <td>6</td> <td>ticks_removed__6</td> <td>The Winter tick (<i>Dermacentor albipictus</i>)</td> </tr> <tr> <td>7</td> <td>ticks_removed__7</td> <td>Others</td> </tr> <tr> <td>8</td> <td>ticks_removed__8</td> <td>I don't know/don't remember</td> </tr> </table> | 1 | ticks_removed__1 | The Blacklegged tick or Deer Tick ( <i>Ixodes scapularis</i> ) | 2  | ticks_removed__2 | The Brown Dog tick ( <i>Rhipicephalus sanguineus</i> ) | 3 | ticks_removed__3 | The Gulf Coast tick ( <i>Amblyomma maculatum</i> ) | 4 | ticks_removed__4 | The Lone Star tick ( <i>Amblyomma americanum</i> ) | 5 | ticks_removed__5 | The American Dog tick ( <i>Dermacentor variabilis</i> ) | 6 | ticks_removed__6 | The Winter tick ( <i>Dermacentor albipictus</i> ) | 7 | ticks_removed__7 | Others | 8 | ticks_removed__8 | I don't know/don't remember |
| 1  | ticks_removed__1                                                        | The Blacklegged tick or Deer Tick ( <i>Ixodes scapularis</i> )                                                                                                                                                        |                                                                                                                                                                                                                                                                                                                                                                                                                                                                                                                                                                                                                                                                                                                                                                                                                                                                              |   |                  |                                                                |    |                  |                                                        |   |                  |                                                    |   |                  |                                                    |   |                  |                                                         |   |                  |                                                   |   |                  |        |   |                  |                             |
| 2  | ticks_removed__2                                                        | The Brown Dog tick ( <i>Rhipicephalus sanguineus</i> )                                                                                                                                                                |                                                                                                                                                                                                                                                                                                                                                                                                                                                                                                                                                                                                                                                                                                                                                                                                                                                                              |   |                  |                                                                |    |                  |                                                        |   |                  |                                                    |   |                  |                                                    |   |                  |                                                         |   |                  |                                                   |   |                  |        |   |                  |                             |
| 3  | ticks_removed__3                                                        | The Gulf Coast tick ( <i>Amblyomma maculatum</i> )                                                                                                                                                                    |                                                                                                                                                                                                                                                                                                                                                                                                                                                                                                                                                                                                                                                                                                                                                                                                                                                                              |   |                  |                                                                |    |                  |                                                        |   |                  |                                                    |   |                  |                                                    |   |                  |                                                         |   |                  |                                                   |   |                  |        |   |                  |                             |
| 4  | ticks_removed__4                                                        | The Lone Star tick ( <i>Amblyomma americanum</i> )                                                                                                                                                                    |                                                                                                                                                                                                                                                                                                                                                                                                                                                                                                                                                                                                                                                                                                                                                                                                                                                                              |   |                  |                                                                |    |                  |                                                        |   |                  |                                                    |   |                  |                                                    |   |                  |                                                         |   |                  |                                                   |   |                  |        |   |                  |                             |
| 5  | ticks_removed__5                                                        | The American Dog tick ( <i>Dermacentor variabilis</i> )                                                                                                                                                               |                                                                                                                                                                                                                                                                                                                                                                                                                                                                                                                                                                                                                                                                                                                                                                                                                                                                              |   |                  |                                                                |    |                  |                                                        |   |                  |                                                    |   |                  |                                                    |   |                  |                                                         |   |                  |                                                   |   |                  |        |   |                  |                             |
| 6  | ticks_removed__6                                                        | The Winter tick ( <i>Dermacentor albipictus</i> )                                                                                                                                                                     |                                                                                                                                                                                                                                                                                                                                                                                                                                                                                                                                                                                                                                                                                                                                                                                                                                                                              |   |                  |                                                                |    |                  |                                                        |   |                  |                                                    |   |                  |                                                    |   |                  |                                                         |   |                  |                                                   |   |                  |        |   |                  |                             |
| 7  | ticks_removed__7                                                        | Others                                                                                                                                                                                                                |                                                                                                                                                                                                                                                                                                                                                                                                                                                                                                                                                                                                                                                                                                                                                                                                                                                                              |   |                  |                                                                |    |                  |                                                        |   |                  |                                                    |   |                  |                                                    |   |                  |                                                         |   |                  |                                                   |   |                  |        |   |                  |                             |
| 8  | ticks_removed__8                                                        | I don't know/don't remember                                                                                                                                                                                           |                                                                                                                                                                                                                                                                                                                                                                                                                                                                                                                                                                                                                                                                                                                                                                                                                                                                              |   |                  |                                                                |    |                  |                                                        |   |                  |                                                    |   |                  |                                                    |   |                  |                                                         |   |                  |                                                   |   |                  |        |   |                  |                             |
| 60 | other_removed<br>Show the field ONLY if:<br>[ticks_removed(7)] = '1'    | Please specify:                                                                                                                                                                                                       | notes                                                                                                                                                                                                                                                                                                                                                                                                                                                                                                                                                                                                                                                                                                                                                                                                                                                                        |   |                  |                                                                |    |                  |                                                        |   |                  |                                                    |   |                  |                                                    |   |                  |                                                         |   |                  |                                                   |   |                  |        |   |                  |                             |
| 61 | exposure                                                                | Do you routinely ask about tick exposure when talking to clients?                                                                                                                                                     | yesno<br><table border="1"> <tr> <td>1</td> <td>Yes</td> </tr> <tr> <td>0</td> <td>No</td> </tr> </table>                                                                                                                                                                                                                                                                                                                                                                                                                                                                                                                                                                                                                                                                                                                                                                    | 1 | Yes              | 0                                                              | No |                  |                                                        |   |                  |                                                    |   |                  |                                                    |   |                  |                                                         |   |                  |                                                   |   |                  |        |   |                  |                             |
| 1  | Yes                                                                     |                                                                                                                                                                                                                       |                                                                                                                                                                                                                                                                                                                                                                                                                                                                                                                                                                                                                                                                                                                                                                                                                                                                              |   |                  |                                                                |    |                  |                                                        |   |                  |                                                    |   |                  |                                                    |   |                  |                                                         |   |                  |                                                   |   |                  |        |   |                  |                             |
| 0  | No                                                                      |                                                                                                                                                                                                                       |                                                                                                                                                                                                                                                                                                                                                                                                                                                                                                                                                                                                                                                                                                                                                                                                                                                                              |   |                  |                                                                |    |                  |                                                        |   |                  |                                                    |   |                  |                                                    |   |                  |                                                         |   |                  |                                                   |   |                  |        |   |                  |                             |

|    |                                                                                  |                                                                             |                                                                                                                                                                                                                                                                                                                       |   |                          |       |                                      |                     |                                               |   |                     |             |      |                     |       |
|----|----------------------------------------------------------------------------------|-----------------------------------------------------------------------------|-----------------------------------------------------------------------------------------------------------------------------------------------------------------------------------------------------------------------------------------------------------------------------------------------------------------------|---|--------------------------|-------|--------------------------------------|---------------------|-----------------------------------------------|---|---------------------|-------------|------|---------------------|-------|
| 62 | when_to_test                                                                     | When do you test for tick-borne diseases?                                   | radio<br><table border="1"> <tr> <td>1</td> <td>Routinely</td> </tr> <tr> <td>2</td> <td>When suspecting a tick-borne disease</td> </tr> <tr> <td>3</td> <td>To rule out a tick-borne disease</td> </tr> </table>                                                                                                     | 1 | Routinely                | 2     | When suspecting a tick-borne disease | 3                   | To rule out a tick-borne disease              |   |                     |             |      |                     |       |
| 1  | Routinely                                                                        |                                                                             |                                                                                                                                                                                                                                                                                                                       |   |                          |       |                                      |                     |                                               |   |                     |             |      |                     |       |
| 2  | When suspecting a tick-borne disease                                             |                                                                             |                                                                                                                                                                                                                                                                                                                       |   |                          |       |                                      |                     |                                               |   |                     |             |      |                     |       |
| 3  | To rule out a tick-borne disease                                                 |                                                                             |                                                                                                                                                                                                                                                                                                                       |   |                          |       |                                      |                     |                                               |   |                     |             |      |                     |       |
| 63 | disease_and_test                                                                 | Which tick-borne diseases do you test for and what tests do you use?        | notes                                                                                                                                                                                                                                                                                                                 |   |                          |       |                                      |                     |                                               |   |                     |             |      |                     |       |
| 64 | preferred_sample                                                                 | What samples do you prefer to use/submit? (Please select those that apply). | checkbox<br><table border="1"> <tr> <td>1</td> <td>preferred_sample__1</td> <td>Serum</td> </tr> <tr> <td>2</td> <td>preferred_sample__2</td> <td>Blood</td> </tr> <tr> <td>3</td> <td>preferred_sample__3</td> <td>Joint fluid</td> </tr> <tr> <td>4</td> <td>preferred_sample__4</td> <td>Other</td> </tr> </table> | 1 | preferred_sample__1      | Serum | 2                                    | preferred_sample__2 | Blood                                         | 3 | preferred_sample__3 | Joint fluid | 4    | preferred_sample__4 | Other |
| 1  | preferred_sample__1                                                              | Serum                                                                       |                                                                                                                                                                                                                                                                                                                       |   |                          |       |                                      |                     |                                               |   |                     |             |      |                     |       |
| 2  | preferred_sample__2                                                              | Blood                                                                       |                                                                                                                                                                                                                                                                                                                       |   |                          |       |                                      |                     |                                               |   |                     |             |      |                     |       |
| 3  | preferred_sample__3                                                              | Joint fluid                                                                 |                                                                                                                                                                                                                                                                                                                       |   |                          |       |                                      |                     |                                               |   |                     |             |      |                     |       |
| 4  | preferred_sample__4                                                              | Other                                                                       |                                                                                                                                                                                                                                                                                                                       |   |                          |       |                                      |                     |                                               |   |                     |             |      |                     |       |
| 65 | preferred_sample_other<br>Show the field ONLY if:<br>[preferred_sample(4)] = '1' | Please specify:                                                             | checkbox                                                                                                                                                                                                                                                                                                              |   |                          |       |                                      |                     |                                               |   |                     |             |      |                     |       |
| 66 | test_number                                                                      | How many tests for tick-borne diseases have you performed in the past year? | radio<br><table border="1"> <tr> <td>1</td> <td>1-10</td> </tr> <tr> <td>2</td> <td>10-50</td> </tr> <tr> <td>3</td> <td>50-100</td> </tr> <tr> <td>4</td> <td>100-200</td> </tr> <tr> <td>5</td> <td>200+</td> </tr> </table>                                                                                        | 1 | 1-10                     | 2     | 10-50                                | 3                   | 50-100                                        | 4 | 100-200             | 5           | 200+ |                     |       |
| 1  | 1-10                                                                             |                                                                             |                                                                                                                                                                                                                                                                                                                       |   |                          |       |                                      |                     |                                               |   |                     |             |      |                     |       |
| 2  | 10-50                                                                            |                                                                             |                                                                                                                                                                                                                                                                                                                       |   |                          |       |                                      |                     |                                               |   |                     |             |      |                     |       |
| 3  | 50-100                                                                           |                                                                             |                                                                                                                                                                                                                                                                                                                       |   |                          |       |                                      |                     |                                               |   |                     |             |      |                     |       |
| 4  | 100-200                                                                          |                                                                             |                                                                                                                                                                                                                                                                                                                       |   |                          |       |                                      |                     |                                               |   |                     |             |      |                     |       |
| 5  | 200+                                                                             |                                                                             |                                                                                                                                                                                                                                                                                                                       |   |                          |       |                                      |                     |                                               |   |                     |             |      |                     |       |
| 67 | decline_testing                                                                  | What is the main reason clients decline testing for tick-borne diseases?    | radio<br><table border="1"> <tr> <td>1</td> <td>They find it unnecessary</td> </tr> <tr> <td>2</td> <td>Cost is a limiting factor</td> </tr> <tr> <td>3</td> <td>Tick-borne disease is not a main differential</td> </tr> <tr> <td>4</td> <td>Other</td> </tr> </table>                                               | 1 | They find it unnecessary | 2     | Cost is a limiting factor            | 3                   | Tick-borne disease is not a main differential | 4 | Other               |             |      |                     |       |
| 1  | They find it unnecessary                                                         |                                                                             |                                                                                                                                                                                                                                                                                                                       |   |                          |       |                                      |                     |                                               |   |                     |             |      |                     |       |
| 2  | Cost is a limiting factor                                                        |                                                                             |                                                                                                                                                                                                                                                                                                                       |   |                          |       |                                      |                     |                                               |   |                     |             |      |                     |       |
| 3  | Tick-borne disease is not a main differential                                    |                                                                             |                                                                                                                                                                                                                                                                                                                       |   |                          |       |                                      |                     |                                               |   |                     |             |      |                     |       |
| 4  | Other                                                                            |                                                                             |                                                                                                                                                                                                                                                                                                                       |   |                          |       |                                      |                     |                                               |   |                     |             |      |                     |       |
| 68 | decline_other<br>Show the field ONLY if:<br>[decline_testing] = '4'              | Please specify:                                                             | notes                                                                                                                                                                                                                                                                                                                 |   |                          |       |                                      |                     |                                               |   |                     |             |      |                     |       |

|    |                                                                     |                                                                                                                                                               |                                                                                                                                                                                                                                                                                    |   |      |   |        |   |        |   |        |   |         |   |                     |
|----|---------------------------------------------------------------------|---------------------------------------------------------------------------------------------------------------------------------------------------------------|------------------------------------------------------------------------------------------------------------------------------------------------------------------------------------------------------------------------------------------------------------------------------------|---|------|---|--------|---|--------|---|--------|---|---------|---|---------------------|
| 69 | travel_history                                                      | When you have a patient present with signs of a tick-borne disease like a fever of unknown origin, joint pain, and lethargy, do you ask about travel history? | yesno<br><table border="1"> <tr> <td>1</td> <td>Yes</td> </tr> <tr> <td>0</td> <td>No</td> </tr> </table>                                                                                                                                                                          | 1 | Yes  | 0 | No     |   |        |   |        |   |         |   |                     |
| 1  | Yes                                                                 |                                                                                                                                                               |                                                                                                                                                                                                                                                                                    |   |      |   |        |   |        |   |        |   |         |   |                     |
| 0  | No                                                                  |                                                                                                                                                               |                                                                                                                                                                                                                                                                                    |   |      |   |        |   |        |   |        |   |         |   |                     |
| 70 | suspect_places<br>Show the field ONLY if:<br>[travel_history] = '1' | Please list the places (if any) that would make you suspect tick-borne diseases. (Please be as specific as possible).                                         | notes                                                                                                                                                                                                                                                                              |   |      |   |        |   |        |   |        |   |         |   |                     |
| 71 | highest_tick_numbers                                                | From which species do you remove the most ticks?                                                                                                              | radio<br><table border="1"> <tr> <td>1</td> <td>Cats</td> </tr> <tr> <td>2</td> <td>Dogs</td> </tr> <tr> <td>3</td> <td>Cattle</td> </tr> <tr> <td>4</td> <td>Horses</td> </tr> <tr> <td>5</td> <td>Poultry</td> </tr> <tr> <td>6</td> <td>Exotics/pocket pets</td> </tr> </table> | 1 | Cats | 2 | Dogs   | 3 | Cattle | 4 | Horses | 5 | Poultry | 6 | Exotics/pocket pets |
| 1  | Cats                                                                |                                                                                                                                                               |                                                                                                                                                                                                                                                                                    |   |      |   |        |   |        |   |        |   |         |   |                     |
| 2  | Dogs                                                                |                                                                                                                                                               |                                                                                                                                                                                                                                                                                    |   |      |   |        |   |        |   |        |   |         |   |                     |
| 3  | Cattle                                                              |                                                                                                                                                               |                                                                                                                                                                                                                                                                                    |   |      |   |        |   |        |   |        |   |         |   |                     |
| 4  | Horses                                                              |                                                                                                                                                               |                                                                                                                                                                                                                                                                                    |   |      |   |        |   |        |   |        |   |         |   |                     |
| 5  | Poultry                                                             |                                                                                                                                                               |                                                                                                                                                                                                                                                                                    |   |      |   |        |   |        |   |        |   |         |   |                     |
| 6  | Exotics/pocket pets                                                 |                                                                                                                                                               |                                                                                                                                                                                                                                                                                    |   |      |   |        |   |        |   |        |   |         |   |                     |
| 72 | highest_disease_species                                             | In which species do you diagnose the highest number of tick-borne diseases?                                                                                   | radio<br><table border="1"> <tr> <td>1</td> <td>Cats</td> </tr> <tr> <td>2</td> <td>Dogs</td> </tr> <tr> <td>3</td> <td>Cattle</td> </tr> <tr> <td>4</td> <td>Horses</td> </tr> <tr> <td>5</td> <td>Poultry</td> </tr> <tr> <td>6</td> <td>Exotics/pocket pets</td> </tr> </table> | 1 | Cats | 2 | Dogs   | 3 | Cattle | 4 | Horses | 5 | Poultry | 6 | Exotics/pocket pets |
| 1  | Cats                                                                |                                                                                                                                                               |                                                                                                                                                                                                                                                                                    |   |      |   |        |   |        |   |        |   |         |   |                     |
| 2  | Dogs                                                                |                                                                                                                                                               |                                                                                                                                                                                                                                                                                    |   |      |   |        |   |        |   |        |   |         |   |                     |
| 3  | Cattle                                                              |                                                                                                                                                               |                                                                                                                                                                                                                                                                                    |   |      |   |        |   |        |   |        |   |         |   |                     |
| 4  | Horses                                                              |                                                                                                                                                               |                                                                                                                                                                                                                                                                                    |   |      |   |        |   |        |   |        |   |         |   |                     |
| 5  | Poultry                                                             |                                                                                                                                                               |                                                                                                                                                                                                                                                                                    |   |      |   |        |   |        |   |        |   |         |   |                     |
| 6  | Exotics/pocket pets                                                 |                                                                                                                                                               |                                                                                                                                                                                                                                                                                    |   |      |   |        |   |        |   |        |   |         |   |                     |
| 73 | your_treatment                                                      | How do you treat tick-borne diseases?                                                                                                                         | notes                                                                                                                                                                                                                                                                              |   |      |   |        |   |        |   |        |   |         |   |                     |
| 74 | resistance                                                          | What is your level of concern about antimicrobial resistance in regards to the treatment of tick-borne diseases?                                              | dropdown<br><table border="1"> <tr> <td>1</td> <td>Low</td> </tr> <tr> <td>2</td> <td>Medium</td> </tr> <tr> <td>3</td> <td>High</td> </tr> </table><br>Custom alignment: RH                                                                                                       | 1 | Low  | 2 | Medium | 3 | High   |   |        |   |         |   |                     |
| 1  | Low                                                                 |                                                                                                                                                               |                                                                                                                                                                                                                                                                                    |   |      |   |        |   |        |   |        |   |         |   |                     |
| 2  | Medium                                                              |                                                                                                                                                               |                                                                                                                                                                                                                                                                                    |   |      |   |        |   |        |   |        |   |         |   |                     |
| 3  | High                                                                |                                                                                                                                                               |                                                                                                                                                                                                                                                                                    |   |      |   |        |   |        |   |        |   |         |   |                     |

|    |                                                                    |                                                                                                                                                                                                                                                                                                                                                                                                                                                                                                                                                                                                                                  |                                                                                                                                                                                                                                                                                                                                        |   |              |                  |            |              |          |   |              |                    |   |              |       |
|----|--------------------------------------------------------------------|----------------------------------------------------------------------------------------------------------------------------------------------------------------------------------------------------------------------------------------------------------------------------------------------------------------------------------------------------------------------------------------------------------------------------------------------------------------------------------------------------------------------------------------------------------------------------------------------------------------------------------|----------------------------------------------------------------------------------------------------------------------------------------------------------------------------------------------------------------------------------------------------------------------------------------------------------------------------------------|---|--------------|------------------|------------|--------------|----------|---|--------------|--------------------|---|--------------|-------|
| 75 | disease_info                                                       | Do you provide information about tick-borne diseases to your clients on a routine basis?                                                                                                                                                                                                                                                                                                                                                                                                                                                                                                                                         | yesno<br><table border="1"> <tr> <td>1</td> <td>Yes</td> </tr> <tr> <td>0</td> <td>No</td> </tr> </table><br>Custom alignment: RH                                                                                                                                                                                                      | 1 | Yes          | 0                | No         |              |          |   |              |                    |   |              |       |
| 1  | Yes                                                                |                                                                                                                                                                                                                                                                                                                                                                                                                                                                                                                                                                                                                                  |                                                                                                                                                                                                                                                                                                                                        |   |              |                  |            |              |          |   |              |                    |   |              |       |
| 0  | No                                                                 |                                                                                                                                                                                                                                                                                                                                                                                                                                                                                                                                                                                                                                  |                                                                                                                                                                                                                                                                                                                                        |   |              |                  |            |              |          |   |              |                    |   |              |       |
| 76 | info_form                                                          | If you do provide information to your clients about tick-borne diseases, how do you do this?                                                                                                                                                                                                                                                                                                                                                                                                                                                                                                                                     | checkbox<br><table border="1"> <tr> <td>1</td> <td>info_form__1</td> <td>Flyers/pamphlets</td> </tr> <tr> <td>2</td> <td>info_form__2</td> <td>Verbally</td> </tr> <tr> <td>3</td> <td>info_form__3</td> <td>Refer to a website</td> </tr> <tr> <td>4</td> <td>info_form__4</td> <td>Other</td> </tr> </table><br>Custom alignment: RH | 1 | info_form__1 | Flyers/pamphlets | 2          | info_form__2 | Verbally | 3 | info_form__3 | Refer to a website | 4 | info_form__4 | Other |
| 1  | info_form__1                                                       | Flyers/pamphlets                                                                                                                                                                                                                                                                                                                                                                                                                                                                                                                                                                                                                 |                                                                                                                                                                                                                                                                                                                                        |   |              |                  |            |              |          |   |              |                    |   |              |       |
| 2  | info_form__2                                                       | Verbally                                                                                                                                                                                                                                                                                                                                                                                                                                                                                                                                                                                                                         |                                                                                                                                                                                                                                                                                                                                        |   |              |                  |            |              |          |   |              |                    |   |              |       |
| 3  | info_form__3                                                       | Refer to a website                                                                                                                                                                                                                                                                                                                                                                                                                                                                                                                                                                                                               |                                                                                                                                                                                                                                                                                                                                        |   |              |                  |            |              |          |   |              |                    |   |              |       |
| 4  | info_form__4                                                       | Other                                                                                                                                                                                                                                                                                                                                                                                                                                                                                                                                                                                                                            |                                                                                                                                                                                                                                                                                                                                        |   |              |                  |            |              |          |   |              |                    |   |              |       |
| 77 | info_form_other<br>Show the field ONLY if:<br>[info_form(4)] = '1' | Please specify:                                                                                                                                                                                                                                                                                                                                                                                                                                                                                                                                                                                                                  | text<br>Custom alignment: RH                                                                                                                                                                                                                                                                                                           |   |              |                  |            |              |          |   |              |                    |   |              |       |
| 78 | additional_info                                                    | Section Header: <i>Final Questions</i><br>Do you have any information you would like to share? If so, please include it here.                                                                                                                                                                                                                                                                                                                                                                                                                                                                                                    | notes<br>Custom alignment: RH                                                                                                                                                                                                                                                                                                          |   |              |                  |            |              |          |   |              |                    |   |              |       |
| 79 | final_questions                                                    | Please include any questions you have about this survey or its content.                                                                                                                                                                                                                                                                                                                                                                                                                                                                                                                                                          | notes<br>Custom alignment: RH                                                                                                                                                                                                                                                                                                          |   |              |                  |            |              |          |   |              |                    |   |              |       |
| 80 | address                                                            | Section Header: <i>Thank you for completing this survey. Your answers are highly valued and will help improve our knowledge of ticks and tick-borne disease in your area, so that we in-turn can help you formulate a more accurate tick-borne disease differential list. Thank you again for your help. We could never perform a study like this without people like you. Please fill out the brief form below if you would like to receive your complimentary commemorative poster.</i><br><br>Please type your name and mailing address here if you wish to receive your complimentary commemorative poster. Thank you again. | notes, Identifier<br>Custom alignment: RH                                                                                                                                                                                                                                                                                              |   |              |                  |            |              |          |   |              |                    |   |              |       |
| 81 | veterinary_kap_survey_complete                                     | Section Header: <i>Form Status</i><br>Complete?                                                                                                                                                                                                                                                                                                                                                                                                                                                                                                                                                                                  | dropdown<br><table border="1"> <tr> <td>0</td> <td>Incomplete</td> </tr> <tr> <td>1</td> <td>Unverified</td> </tr> <tr> <td>2</td> <td>Complete</td> </tr> </table>                                                                                                                                                                    | 0 | Incomplete   | 1                | Unverified | 2            | Complete |   |              |                    |   |              |       |
| 0  | Incomplete                                                         |                                                                                                                                                                                                                                                                                                                                                                                                                                                                                                                                                                                                                                  |                                                                                                                                                                                                                                                                                                                                        |   |              |                  |            |              |          |   |              |                    |   |              |       |
| 1  | Unverified                                                         |                                                                                                                                                                                                                                                                                                                                                                                                                                                                                                                                                                                                                                  |                                                                                                                                                                                                                                                                                                                                        |   |              |                  |            |              |          |   |              |                    |   |              |       |
| 2  | Complete                                                           |                                                                                                                                                                                                                                                                                                                                                                                                                                                                                                                                                                                                                                  |                                                                                                                                                                                                                                                                                                                                        |   |              |                  |            |              |          |   |              |                    |   |              |       |
